# Supplementary material for: Synthesis of 5-aryl-3-C-glycosyl- and unsymmetrical 3,5-diaryl-1,2,4-triazoles from alkylidene-amidrazones
Source: Royal Society of Chemistry journal article supplement (doi:10.1039/c5ra05702g), 2015-01-01
Supplement: c5ra05702g1.pdf [file c5ra05702g1.pdf]

## Supporting information

### Synthesis of 5-Aryl-3-C-Glycosyl- and Unsymmetrical 3,5-Diaryl-1,2,4-Triazoles from Alkylidene-Amidrazones

Béla Szöcs, Éva Bokor, Katalin E. Szabó, Attila Kiss-Szikszai, Marietta Tóth,\*  
and László Somsák\*

*Department of Organic Chemistry, University of Debrecen,  
POB 20, H-4010 Debrecen, Hungary*

#### Contents

|                                                                                                                                                                                                                       |           |
|-----------------------------------------------------------------------------------------------------------------------------------------------------------------------------------------------------------------------|-----------|
| <b>SYNTHETIC PROCEDURES AND COMPOUND CHARACTERIZATION</b>                                                                                                                                                             | <b>2</b>  |
| <i>O</i> -Peracylated <i>N</i> -[ <i>C</i> -(β-D-glycopyranosyl)methylideneamino]guanidine ( <b>8</b> ) and <i>N</i> <sup>l</sup> -[ <i>C</i> -(β-D-glycopyranosyl)methylidene]arenecarboxamidrazones ( <b>9-13</b> ) | 2         |
| <i>N</i> <sup>l</sup> -Arylidene- <i>C</i> -(2,3,4,6-tetra- <i>O</i> -benzoyl-β-D-glucopyranosyl)formamidrazones ( <b>18-20</b> )                                                                                     | 12        |
| Transformation of <i>N</i> <sup>l</sup> -arylidene- <i>C</i> -(2,3,4,6-tetra- <i>O</i> -benzoyl-β-D-glucopyranosyl)formamidrazones ( <b>18-20</b> ) by PIDA                                                           | 17        |
| <i>O</i> -Peracylated <i>N</i> -arenecarboximidoyl- <i>C</i> -(β-D-glycopyranosyl)carbohydrazonoyl bromides ( <b>24-29</b> )                                                                                          | 18        |
| <i>O</i> -peracylated 5-(β-D-glycopyranosyl)-3-substituted-1,2,4-triazoles ( <b>21, 30-33</b> )                                                                                                                       | 26        |
| <i>N</i> <sup>l</sup> -arylidene-arenecarboxamidrazones ( <b>35, 36</b> )                                                                                                                                             | 29        |
| 3,5-disubstituted-1,2,4-triazoles ( <b>39, 40</b> )                                                                                                                                                                   | 39        |
| <b>ANALYSIS OF REACTION MIXTURES BY LCMS</b>                                                                                                                                                                          | <b>47</b> |
| <b>REFERENCES</b>                                                                                                                                                                                                     | <b>52</b> |

---

\* Corresponding authors - Tel: +3652512900 ext 22471 (MT) or 22348 (LS), Fax: +3652512744, E-mail: [toth.marietta@science.unideb.hu](mailto:toth.marietta@science.unideb.hu), [somsak.laszlo@science.unideb.hu](mailto:somsak.laszlo@science.unideb.hu).

## SYNTHETIC PROCEDURES AND COMPOUND CHARACTERIZATION

### General procedure I for the synthesis of *O*-peracylated *N*-[*C*-( $\beta$ -D-glycopyranosyl)methylideneamino]guanidine (**8**) and *N*<sup>*l*</sup>-[*C*-( $\beta$ -D-glycopyranosyl)methylidene]arene-carboxamidrazones (**9-13**)

Aminoguanidine  $\times$  H<sub>2</sub>CO<sub>3</sub> (**4**, 0.50 mmol) or an arenecarboxamidrazone (**5-7**, 0.50 mmol) was dissolved in a mixture of pyridine (1.5 mL) and H<sub>2</sub>O (0.9 mL), and stirred for 20 min at rt. Then AcOH (0.9 mL), Raney-Ni (0.38 g, from an aqueous suspension, Merck), NaH<sub>2</sub>PO<sub>2</sub> (0.20 g, 2.27 mmol), and the corresponding *O*-peracylated  $\beta$ -D-glycopyranosyl cyanide (**1-3**, 0.25 mmol) were added to the mixture. The reaction mixture was vigorously stirred and heated at 40 °C. When the reaction was complete (TLC, EtOAc/hexane = 1:2) the insoluble materials were filtered off with suction, and washed with CH<sub>2</sub>Cl<sub>2</sub> (10 mL). The organic layer of the filtrate was separated, washed with H<sub>2</sub>O (2 x 6 mL), dried (MgSO<sub>4</sub>), and evaporated *in vacuo*, traces of pyridine were removed by repeated co-evaporations with toluene. The residue was purified by column chromatography.

### *N*-[*C*-(2,3,4,6-Tetra-*O*-benzoyl- $\beta$ -D-glucopyranosyl)methylideneamino]guanidine (**8**)

Prepared from **1**<sup>1</sup> (3.00 g, 4.95 mmol) and aminoguanidine  $\times$  H<sub>2</sub>CO<sub>3</sub> (**4**, 1.35 g, 9.90 mmol) according to **General procedure I**. Purified by column chromatography (CHCl<sub>3</sub>/MeOH = 16:1) to yield **8** as a brownish amorphous solid (2.1 g, 64%). *R*<sub>f</sub> 0.22 (CHCl<sub>3</sub>/MeOH = 16:1); [ $\alpha$ ]<sub>D</sub> = +45 (c 0.58, CHCl<sub>3</sub>); <sup>1</sup>H NMR (400 MHz, CDCl<sub>3</sub>):  $\delta$  = 8.04-7.99 (m, 2 H, Ar), 7.94-7.89 (m, 2 H, Ar), 7.87-7.80 (m, 4 H, Ar), 7.55-7.23 (m, 13 H, Ar, CH=N), 6.58 (br s, 4 H, 2  $\times$  NH, NH<sub>2</sub>), 5.97, 5.88, 5.69 (3 pseudo t, *J* = 9.6, 10.0 Hz in each H-2, H-3, H-4, 3 H), 4.64 (dd, *J* = 2.9, 12.2 Hz, 1 H, H-6a), 4.48 (dd, *J* = 4.3, 9.5 Hz, 1 H, H-1), 4.46 (dd, *J* = 5.0, 12.2 Hz, 1 H, H-6b), 4.18-4.23 (m, 1 H, H-5) ppm. <sup>13</sup>C NMR (100 MHz, CDCl<sub>3</sub>):  $\delta$  = 166.1, 165.9, 165.8, 165.1 (CO), 158.2 (C=NH), 143.1 (CH=N), 133.5-128.3 (Ar), 76.8, 76.2, 74.1, 69.8,

69.4 (C-1-C-5), 63.1 (C-6) ppm. Anal. Calcd. for C<sub>36</sub>H<sub>32</sub>N<sub>4</sub>O<sub>9</sub> (664.66): C, 65.05, H, 4.85; N, 8.43. Found: C, 65.14; H, 4.93; N, 8.39.

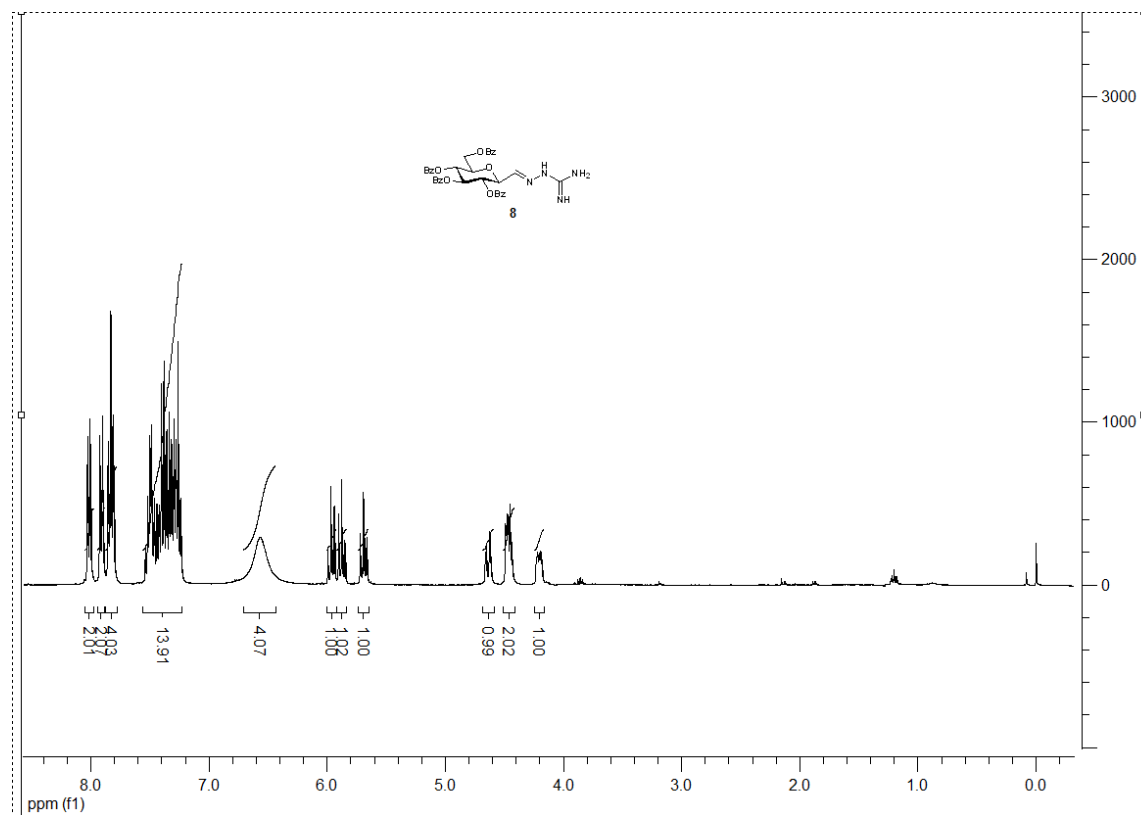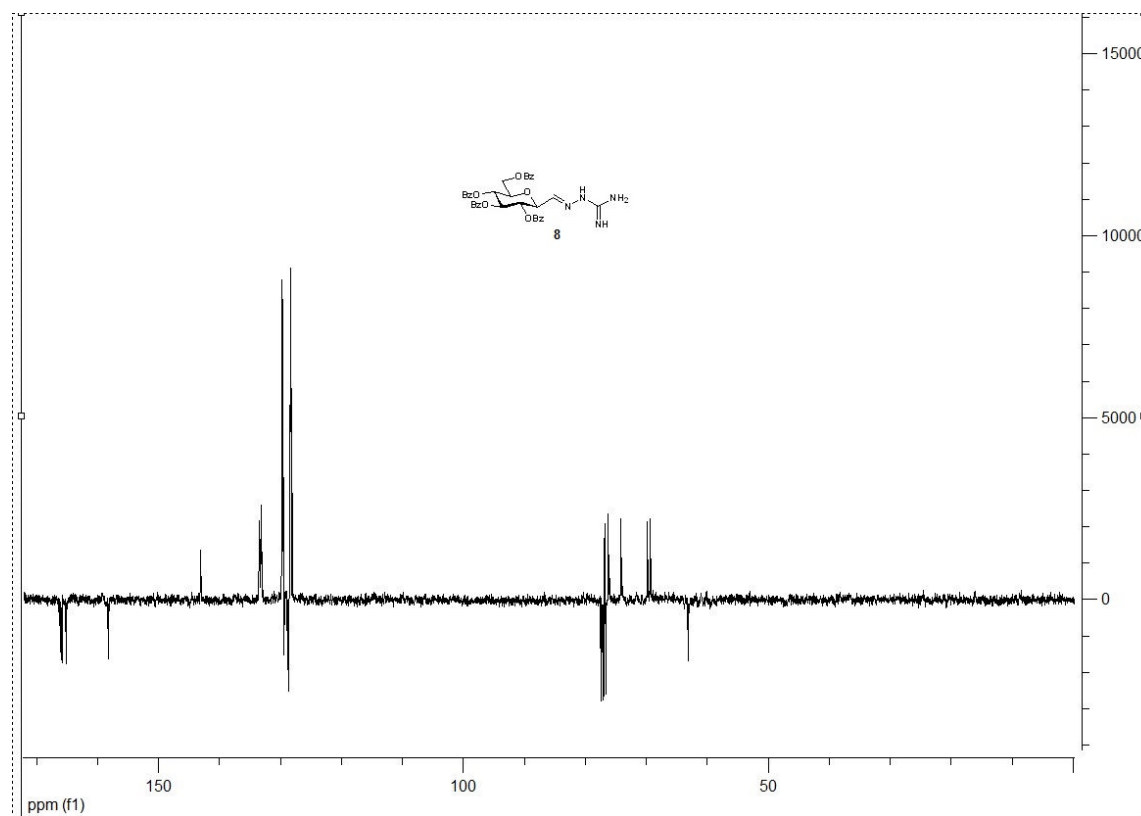

***N*<sup>1</sup>-[C-(2,3,4,6-Tetra-*O*-benzoyl-β-D-glucopyranosyl)methylidene]benzamidrazone (**9**)**

Prepared from **1**<sup>1</sup> (2.52 g, 4.16 mmol) and benzamidrazone (**5**, 1.12 g, 8.32 mmol) according to **General procedure I**. Purified by column chromatography (EtOAc/hexane = 1:2) to yield the title compound **9** as a white amorphous solid (1.45 g, 48%). *R*<sub>f</sub> 0.50 (EtOAc/hexane = 2:3); [α]<sub>D</sub> = +16 (c 0.40, CHCl<sub>3</sub>); <sup>1</sup>H NMR (400 MHz, CDCl<sub>3</sub>): δ = 8.04-7.23 (m, 26 H, Ar, CH=N), 6.06-5.99 (strongly coupled m, 2 H, H-2 and/or H-3 and/or H-4), 5.80-5.58 (m, 3 H, H-2 or H-3 or H-4, NH<sub>2</sub>), 4.67 (dd, *J* = 2.8, 12.3 Hz, 1 H, H-6a), 4.62 (dd, *J* = 2.7, 9.4 Hz, 1 H, H-1), 4.50 (dd, *J* = 5.0, 12.3 Hz, 1 H, H-6b), 4.26 (ddd, *J* = 2.8, 5.0, 9.2 Hz, 1 H, H-5) ppm. <sup>13</sup>C NMR (100 MHz, CDCl<sub>3</sub>): δ = 166.0, 165.8, 165.6, 165.1 (CO), 160.6 (C=NH), 151.3 (CH=N), 133.3-126.5 (Ar), 77.1, 76.1, 74.4, 70.0, 69.5 (C-1-C-5), 63.1 (C-6) ppm. Anal. Calcd. for C<sub>42</sub>H<sub>35</sub>N<sub>3</sub>O<sub>9</sub> (725.74): C, 69.51; H, 4.86; N, 5.79. Found: C, 69.41; H, 4.76; N, 5.71.

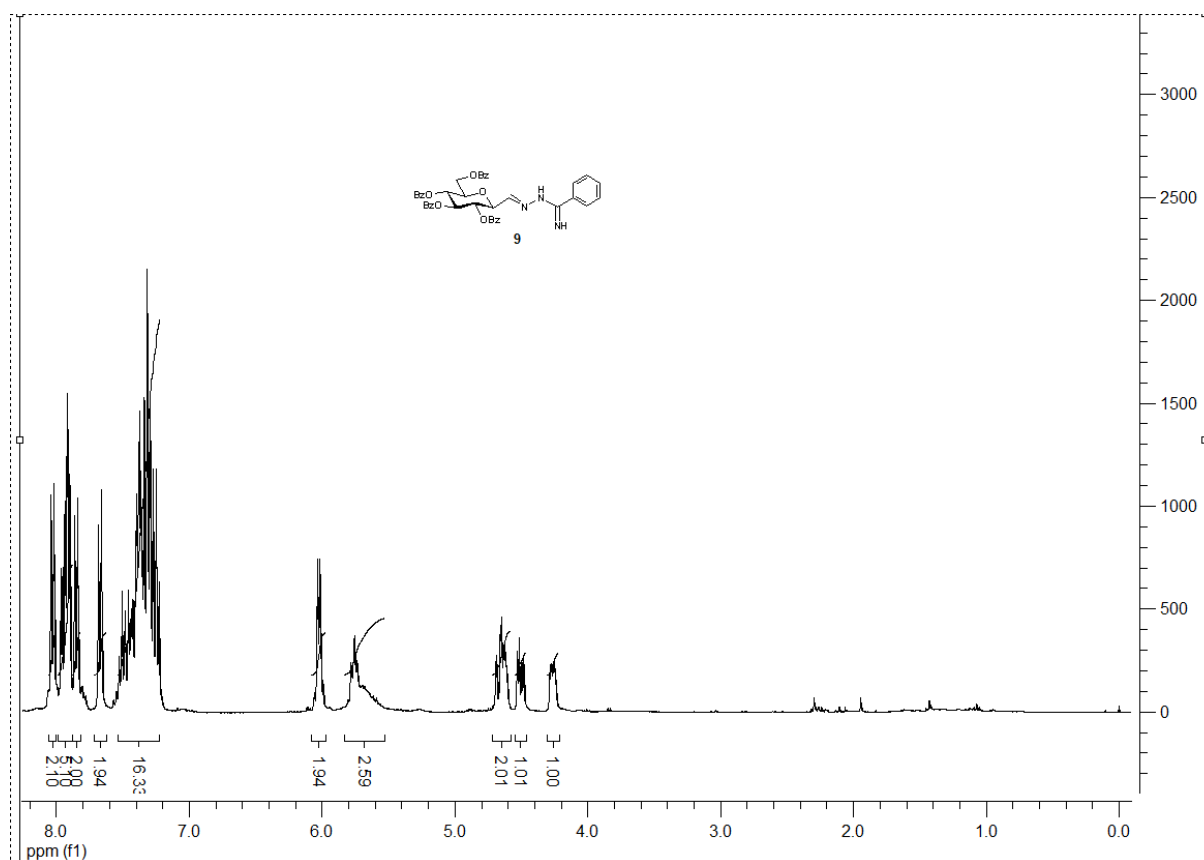

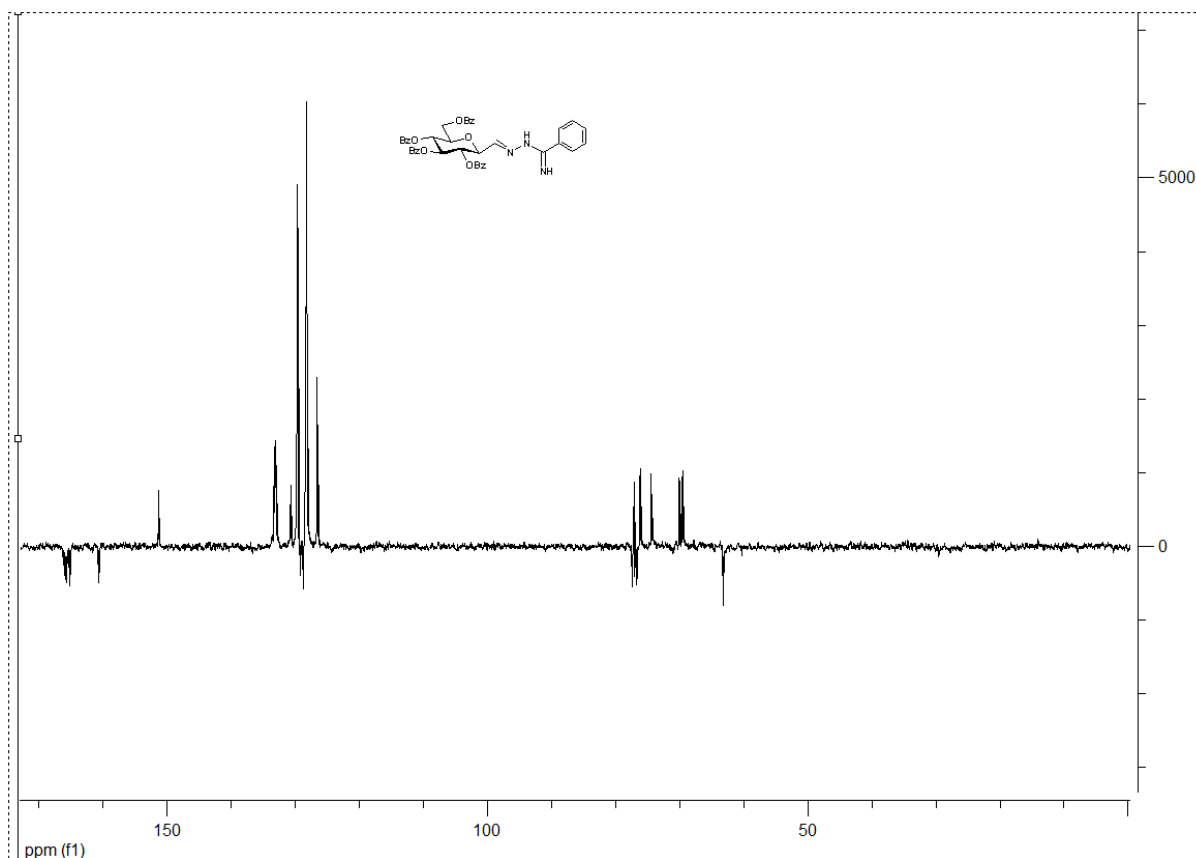

***N*<sup>1</sup>-[C-(2,3,4,6-Tetra-*O*-benzoyl- $\beta$ -D-glucopyranosyl)methylidene]pyridine-2-**

**carboxamidrazone (10)** Prepared from **1**<sup>1</sup> (2.00 g, 3.31 mmol) and pyridine-2-

carboxamidrazone (**6**, 0.90 g, 6.62 mmol) according to **General procedure I**. Purified by column chromatography (EtOAc/hexane = 1:1) to yield the title compound **10** as a white

amorphous solid (1.18 g, 49%). *R*<sub>f</sub> 0.55 (EtOAc/hexane = 1:1); [ $\alpha$ ]<sub>D</sub> = +59 (c 0.28, CHCl<sub>3</sub>); <sup>1</sup>H

NMR (400 MHz, CDCl<sub>3</sub>):  $\delta$  = 8.45-7.21 (m, 25 H, Ar, CH=N), 6.43 (br s, 2 H, NH<sub>2</sub>), 6.10-

6.02 (strongly coupled m, 2 H, H-2 and/or H-3 and/or H-4), 5.80 (pseudo t, *J* = 9.3, 9.6 Hz, 1

H, H-2 or H-3 or H-4), 4.70 (dd, *J* = 3.0, 12.2 Hz, 1 H, H-6a), 4.66 (dd, *J* = 4.2, 9.6 Hz, 1 H,

H-1), 4.54 (dd, *J* = 5.4, 12.2 Hz, 1 H, H-6b), 4.30 (ddd, *J* = 3.0, 5.1, 9.9 Hz, 1 H, H-5) ppm.

<sup>13</sup>C NMR (100 MHz, CDCl<sub>3</sub>):  $\delta$  = 165.9, 165.7, 165.5, 165.0 (CO), 157.7 (C=NH), 151.5

(CH=N), 149.6, 148.0, 136.3-121.3 (Ar), 77.1, 76.1, 74.3, 70.0, 69.4 (C-1-C-5), 63.0 (C-6)

ppm. Anal. Calcd. for C<sub>41</sub>H<sub>34</sub>N<sub>4</sub>O<sub>9</sub> (726.73): C, 67.76, H, 4.72; N, 7.71. Found: C, 67.65; H, 4.62; N, 7.61.

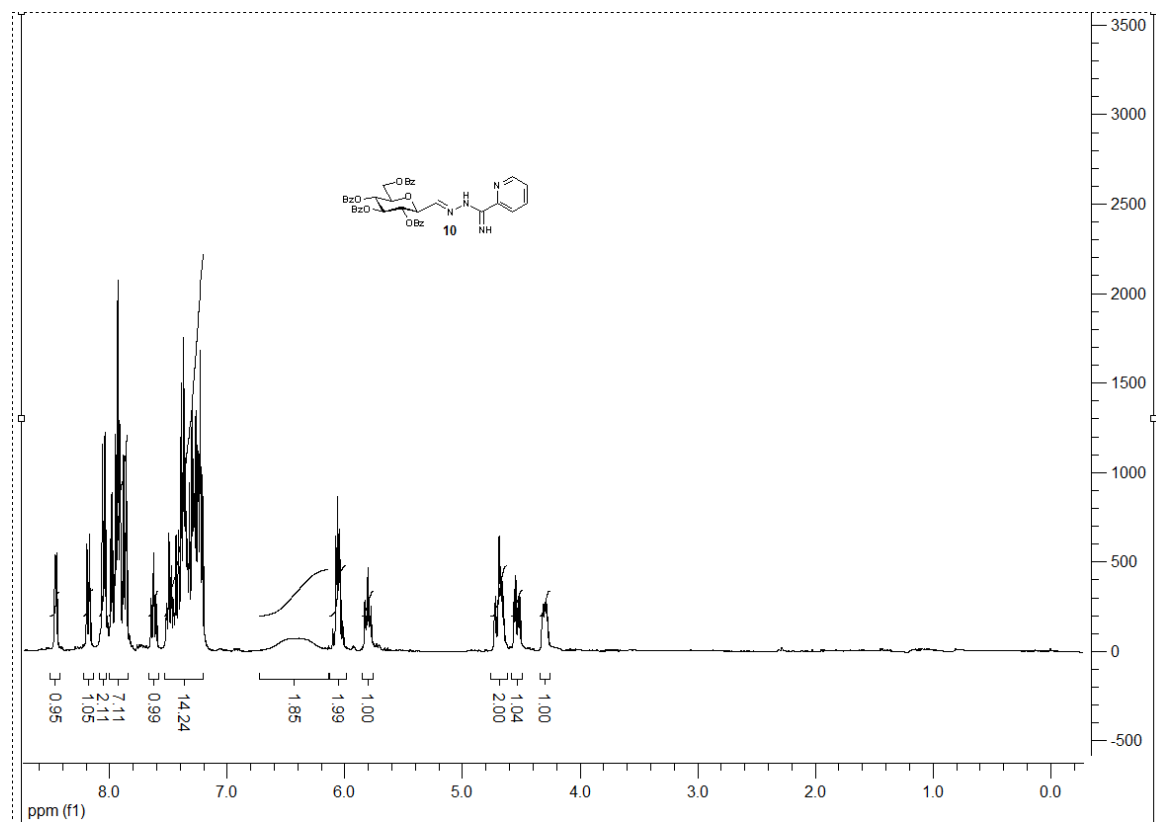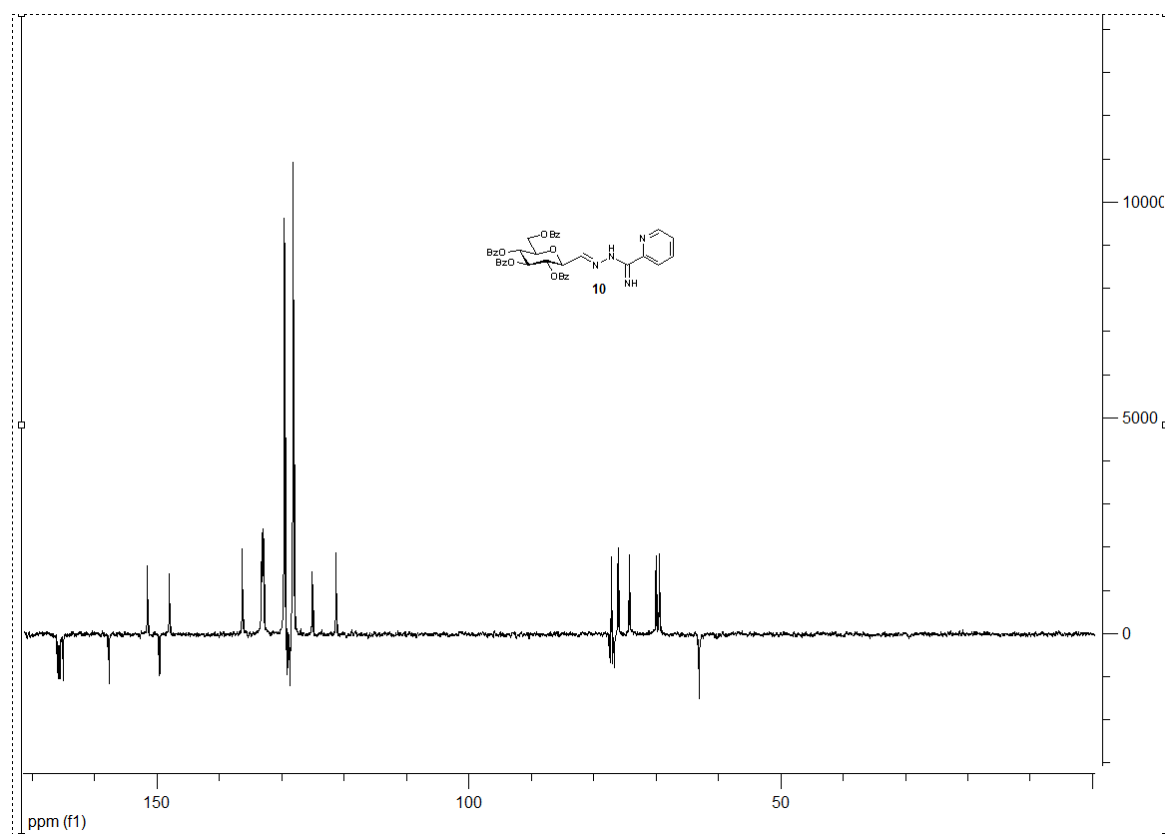

***N*<sup>1</sup>-[C-(2,3,4,6-Tetra-*O*-benzoyl- $\beta$ -D-glucopyranosyl)methylidene]naphthalene-2-**

**carboxamidrazone (11)** Prepared from **1**<sup>1</sup> (1.54 g, 2.55 mmol) and naphthalene-2-carboxamidrazone (**7**, 0.96 g, 5.10 mmol) according to **General procedure I**. Purified by column chromatography (EtOAc/hexane = 1:2) to yield the title compound **11** as a white amorphous solid (1.00 g, 51%). *R*<sub>f</sub> 0.44 (EtOAc/hexane = 1:2); [ $\alpha$ ]<sub>D</sub> = +1 (c 1.10, CHCl<sub>3</sub>); <sup>1</sup>H NMR (400 MHz, CDCl<sub>3</sub>):  $\delta$  = 8.13-7.21 (m, 28 H, Ar, CH=N), 6.09-6.01 (m, 2 H, H-2 and/or H-3 and/or H-4), around 6 (very br s, NH<sub>2</sub>), 5.77 (pseudo t, *J* = 9.6 Hz, 1 H, H-2 or H-3 or H-4), 4.67 (dd, *J* = 2.7, 12.2 Hz, 1 H, H-6a), 4.63 (dd, *J* = 4.3, 9.1 Hz, 1 H, H-1), 4.51 (dd, *J* = 4.9, 12.2 Hz, 1 H, H-6b), 4.24 (ddd, *J* = 2.7, 4.5, 9.5 Hz, 1 H, H-5) ppm. <sup>13</sup>C NMR (100 MHz, CDCl<sub>3</sub>):  $\delta$  = 166.1, 165.9, 165.7, 165.1 (CO), 160.8 (C=NH), 151.4 (CH=N), 134.3-123.7 (Ar), 77.1, 76.1, 74.4, 70.0, 69.5 (C-1-C-5), 63.1 (C-6) ppm. Anal. Calcd. for C<sub>46</sub>H<sub>37</sub>N<sub>3</sub>O<sub>9</sub> (775.80): C, 71.22; H, 4.81; N, 5.42. Found: C, 71.11; H, 4.72; N, 5.51.

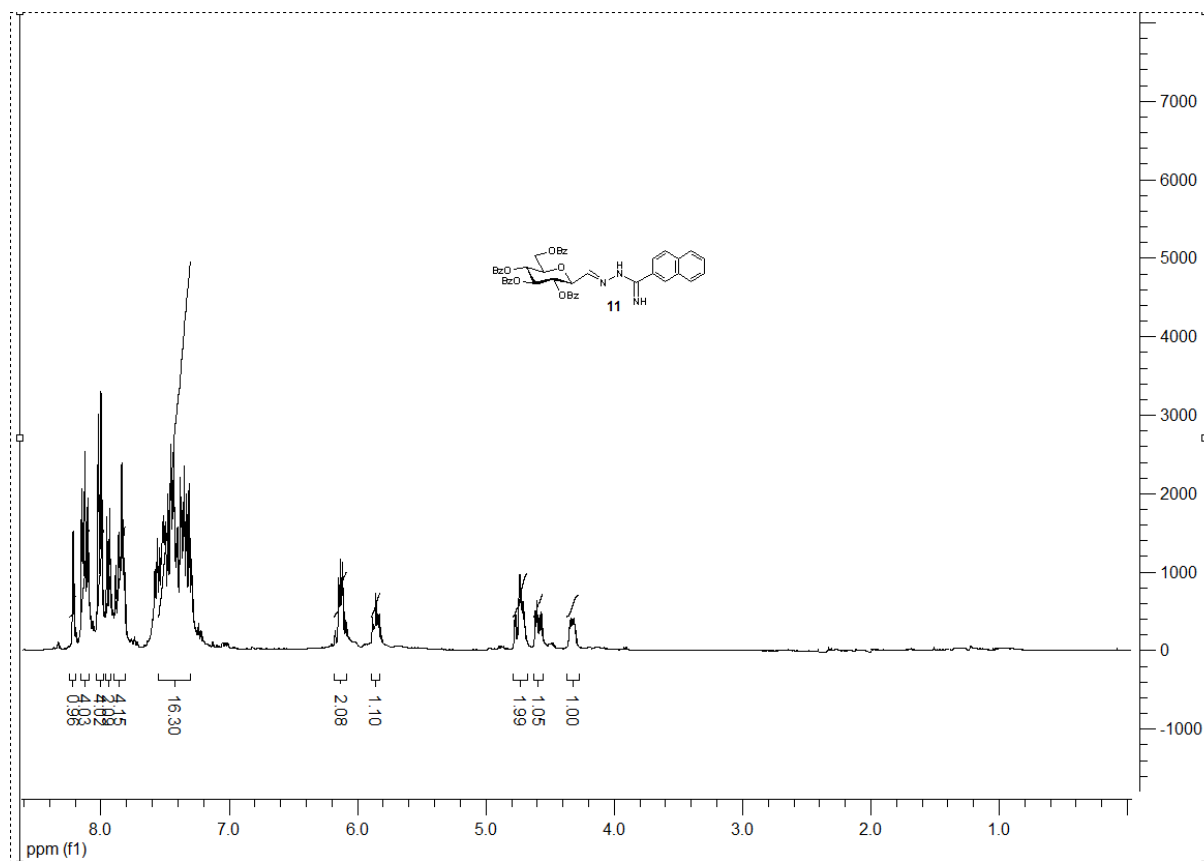

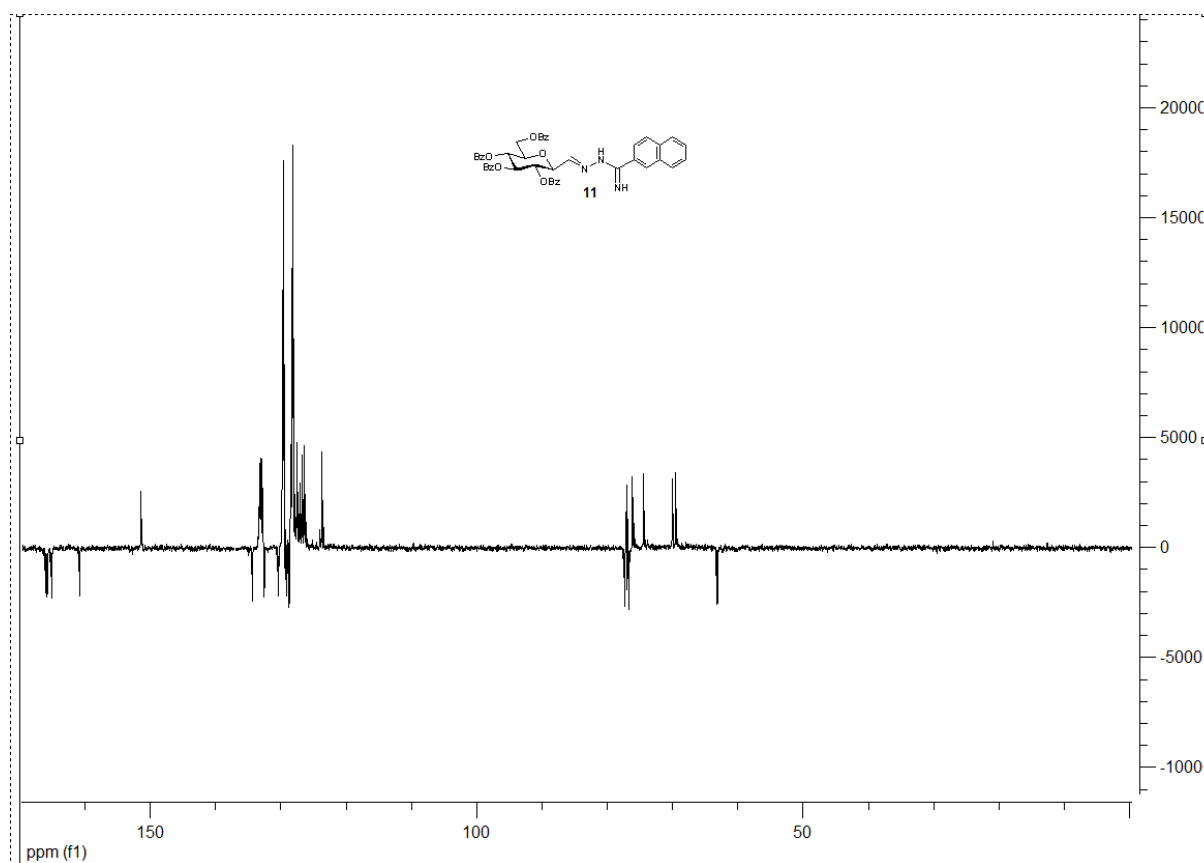

***N*<sup>1</sup>-[C-(2,3,4-Tri-*O*-benzoyl- $\beta$ -D-xylopyranosyl)methylidene]benzamidrazone (**12**)**

Prepared from **2**<sup>2</sup> (1.00 g, 2.12 mmol) and benzamidrazone (**5**, 0.58 g, 4.3 mmol) according to **General procedure I**. Purified by column chromatography (EtOAc/hexane = 2:3) to yield the title compound **12** as a white amorphous solid (0.76 g, 65%). *R*<sub>f</sub> 0.31 (EtOAc/hexane = 2:3); [ $\alpha$ ]<sub>D</sub> = -4 (c 0.29, CHCl<sub>3</sub>); <sup>1</sup>H NMR (400 MHz, CDCl<sub>3</sub>):  $\delta$  = 8.12-7.23 (m, 21 H, Ar, CH=N), 5.96, 5.93 (2 pseudo t, *J* = 9.1, 9.6 Hz, 2 H, H-2, H-3), 5.61 (br s, 1 H, NH), 5.44 (ddd, *J* = 5.3, 9.4, 9.7 Hz, 1 H, H-4), 4.77 (br s, 1 H, NH), 4.53-4.41 (m, 2 H, H-1, H-5a), 3.68 (pseudo t, *J* = 10.5 Hz, 1 H, H-5b) ppm. <sup>13</sup>C NMR (100 MHz, CDCl<sub>3</sub>):  $\delta$  = 165.9, 165.7, 165.5 (CO), 160.6 (C=NH), 151.9 (CH=N), 133.5-126.6 (Ar), 77.5, 73.7, 70.0, 69.9 (C-1-C-4), 66.9 (C-5) ppm. Anal. Calcd. for C<sub>34</sub>H<sub>29</sub>N<sub>3</sub>O<sub>7</sub> (591.61): C, 69.03, H, 4.94; N, 7.10. Found: C, 69.15; H, 5.07; N, 7.00.



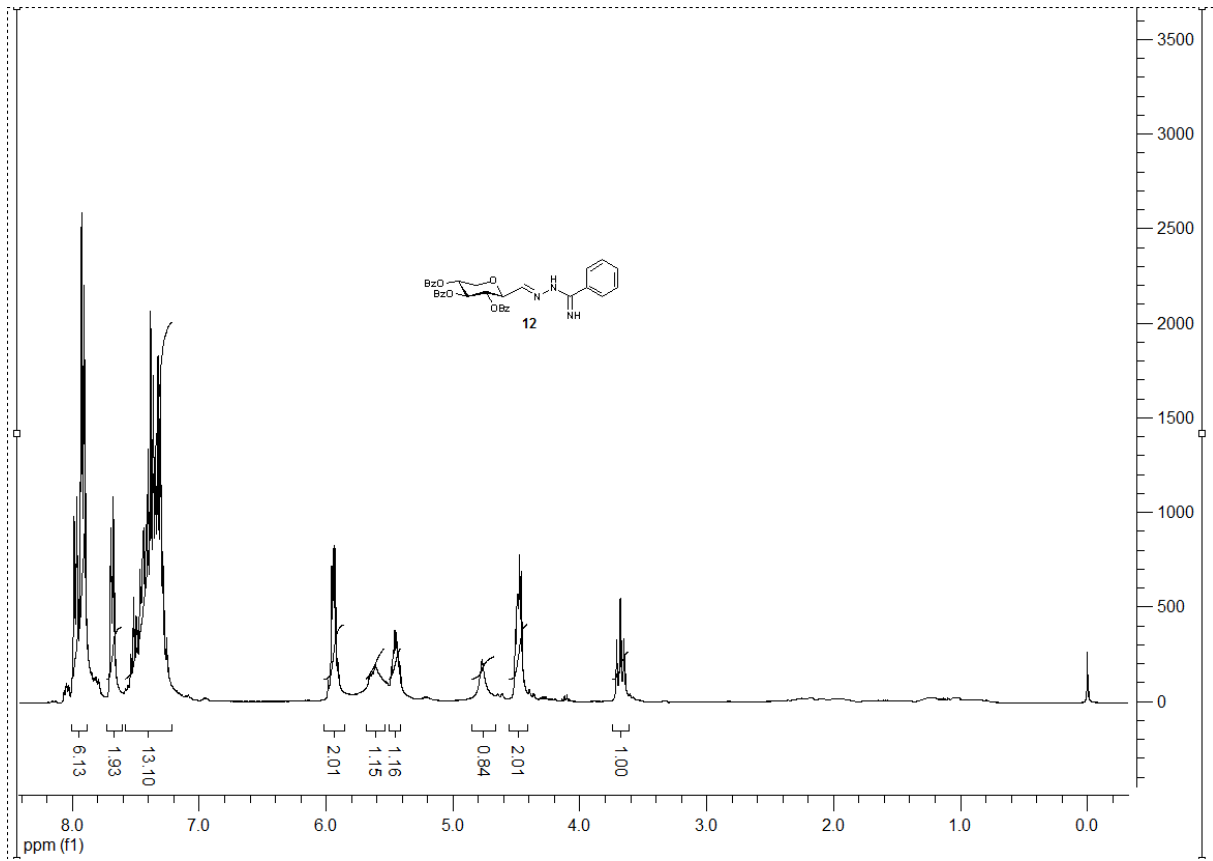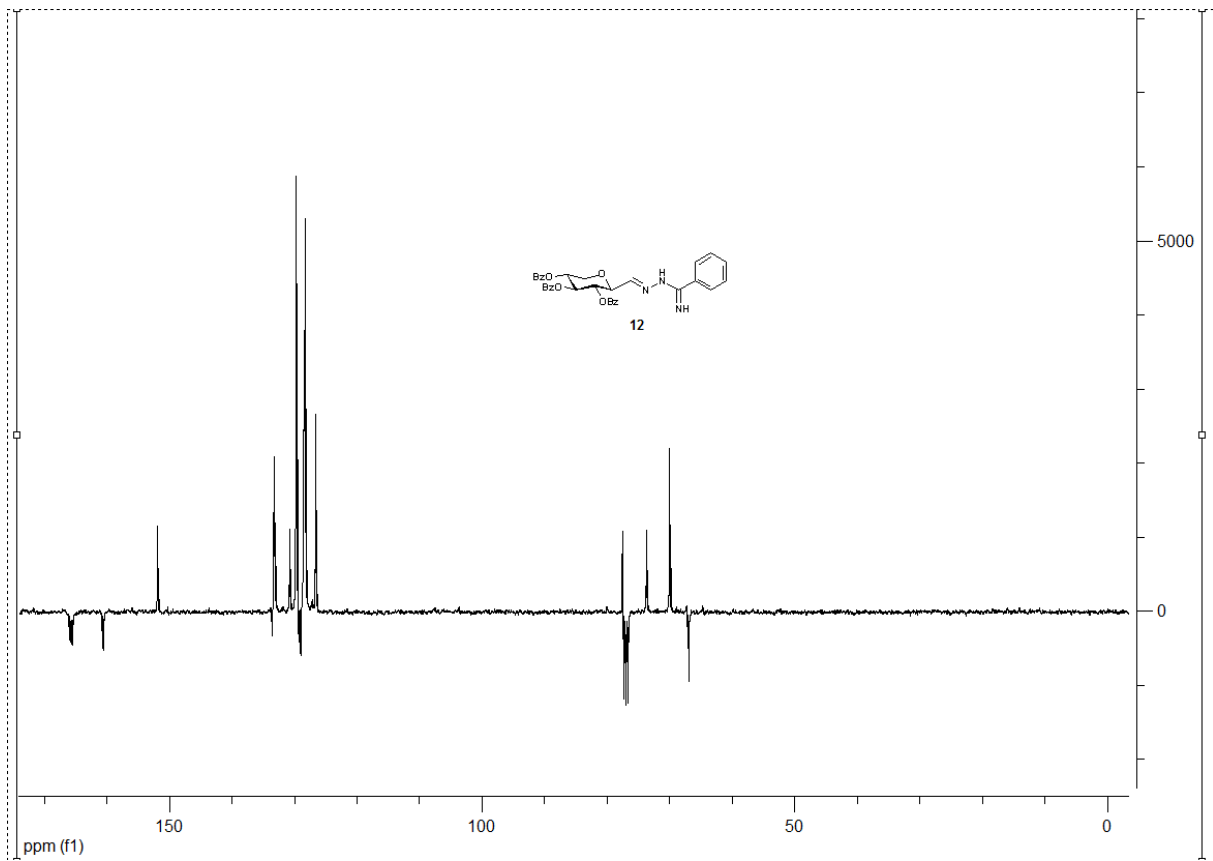

***N*'-[C-(2,3,4,6-Tetra-*O*-acetyl- $\beta$ -D-galactopyranosyl)methylidene]benzamidrazone (**13**)**

Prepared from **3**<sup>3,4</sup> (1.00 g, 2.80 mmol) and benzamidrazone (**5**, 0.76 g, 5.6 mmol) according to **General procedure I**. Purified by column chromatography (EtOAc/hexane = 2:3) to yield the title compound **13** as a white amorphous solid (0.86 g, 64%).  $R_f$  0.28 (EtOAc/hexane = 1:1);  $[\alpha]_D = +20$  (c 0.65, CHCl<sub>3</sub>); <sup>1</sup>H NMR (400 MHz, CDCl<sub>3</sub>):  $\delta$  = 7.85-7.37 (m, 6 H, Ar, CH=N), 5.77 (br s, 2 H, NH<sub>2</sub>), 5.62 (pseudo t,  $J$  = 9.9 Hz, 1 H, H-2), 5.47 (d,  $J$  = 3.1 Hz, 1 H, H-4), 5.13 (dd,  $J$  = 3.4, 10.1 Hz, 1 H, H-3), 4.22 (dd,  $J$  = 4.6, 9.9 Hz, 1 H, H-1), 4.16-4.08 (m, 2 H, H-6a, H-6b), 4.00 (m, 1 H, H-5), 2.17, 2.05, 2.01, 2.00 (4 s, 12 H, CH<sub>3</sub>) ppm. <sup>13</sup>C NMR (100 MHz, CDCl<sub>3</sub>):  $\delta$  = 170.3, 170.2, 170.1 (CO), 160.6 (C=NH), 151.6 (CH=N), 133.5, 130.8, 128.5, 126.6 (Ar), 77.3, 74.3, 72.0, 67.5, 66.7 (C-1–C-5), 63.1 (C-6) ppm. Anal. Calcd. for C<sub>22</sub>H<sub>27</sub>N<sub>3</sub>O<sub>9</sub> (477.46): C, 55.34, H, 5.70; N, 8.80. Found: C, 55.47; H, 5.83; N, 8.92.

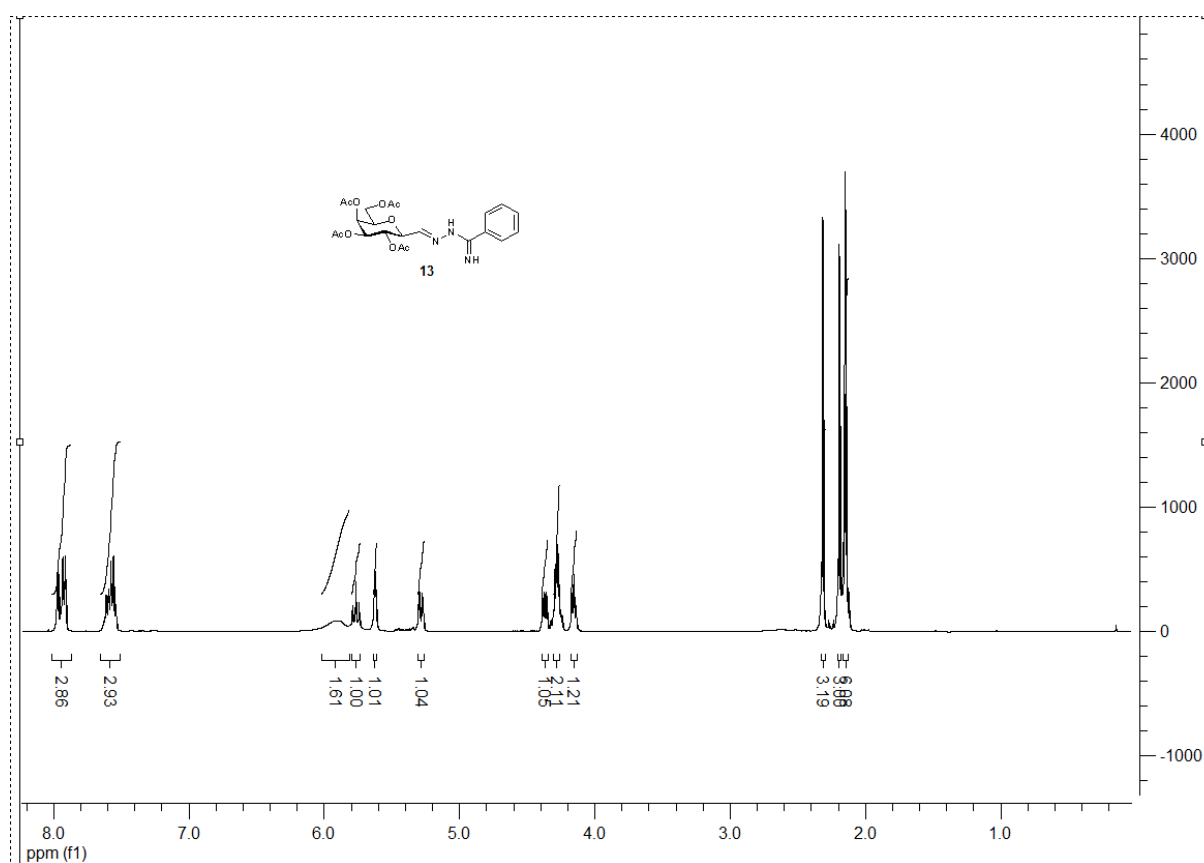

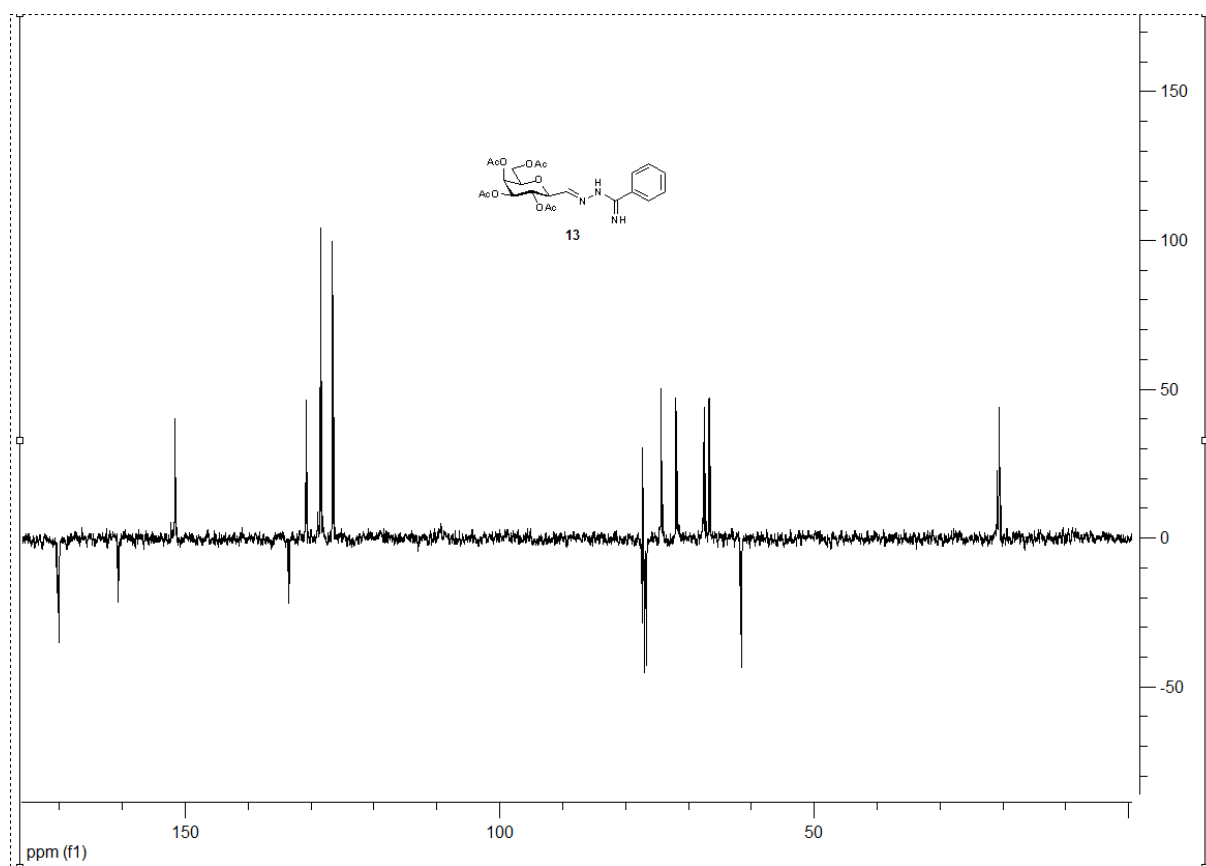

**General procedure II for the synthesis of *N*<sup>l</sup>-arylidene-*C*-(2,3,4,6-tetra-*O*-benzoyl-β-*D*-glucopyranosyl)formamidrazones (18-20)**

*C*-(2,3,4,6-Tetra-*O*-benzoyl-β-*D*-glucopyranosyl)formamidrazones<sup>5</sup> (**14**, 1.0 g, 1.57 mmol) and the corresponding aromatic aldehyde (**15-17**, 1.1 equiv.) was heated in dry EtOH (20 mL) at reflux temperature, and the reaction was monitored by TLC (EtOAc/hexane = 1:1). After total consumption of the starting formamidrazones the product was separated either by filtration or by column chromatography.

***N*<sup>l</sup>-Benzylidene-*C*-(2,3,4,6-tetra-*O*-benzoyl-β-*D*-glucopyranosyl)formamidrazones (18)**

Prepared from formamidrazones **14** (1.2 g, 1.88 mmol) and benzaldehyde (**15**, 0.21 mL, 2.07 mmol) according to **General procedure II**. Reaction time: 2 h. The product precipitated from the hot reaction mixture, was filtered, and used without further purification. Yield: 0.94 g (69%), white solid. Mp: 161-162 °C;  $[\alpha]_D = +3$  (c 0.50, CHCl<sub>3</sub>); <sup>1</sup>H NMR (360 MHz, CDCl<sub>3</sub>):  $\delta$  = 8.07-7.86 (8H, m, Ar), 7.68 (1H, s, =CH), 7.52-7.27 (16H, m, Ar), 6.05, 5.79, 5.74 (3 x 1H, 3 pseudo t,  $J$  = 9.2, 9.2 Hz in each, H-2, H-3, H-4), 5.67 (2H, br s, NH<sub>2</sub>), 4.70 (1H, dd,  $J$  = 11.9, < 1 Hz, H-6a), 4.54 (1H, dd,  $J$  = 11.9, 5.3 Hz, H-6b), 4.52 (1H, d,  $J$  = 9.9 Hz, H-1), 4.28 (1H, ddd,  $J$  = 9.2, 5.3, < 1 Hz, H-5); <sup>13</sup>C NMR (90 MHz, CDCl<sub>3</sub>):  $\delta$  = 166.1, 165.7, 165.3, 165.2 (C=O), 156.6 (C=N), 156.1 (=CH), 134.7-127.8 (Ar), 77.3, 76.4, 73.5, 70.5, 69.2 (C-1 – C-5), 62.9 (C-6). MS-ESI (m/z): calcd for C<sub>42</sub>H<sub>36</sub>N<sub>3</sub>O<sub>9</sub><sup>+</sup> [M+H]<sup>+</sup>: 726.24. Found: 726.7.



***N*'-(4-Methoxybenzylidene)-C-(2,3,4,6-tetra-*O*-benzoyl- $\beta$ -D-glucopyranosyl)-**

**formamidrazone (19)** Prepared from formamidrazone **14** (0.5 g, 0.78 mmol) and *p*-

anisaldehyde (**16**, 105  $\mu$ L, 0.86 mmol) according to **General procedure II**. Reaction time: 4

h. Purified by column chromatography (EtOAc/hexane = 2:3) to give 0.45 g (76%) colourless

symp.  $R_f$ : 0.55 (EtOAc/hexane = 2:3);  $[\alpha]_D = -10$  (c 0.50,  $\text{CHCl}_3$ );  $^1\text{H}$  NMR (360 MHz,

$\text{CDCl}_3$ ):  $\delta = 8.06$ - $7.85$  (8H, m, Ar),  $7.62$  (1H, s, =CH),  $7.59$ - $7.27$  (14H, m, Ar),  $6.84$  (2H, d,  $J$

= 8.6 Hz, Ar),  $6.02$ ,  $5.76$ ,  $5.70$  (3 x 1H, 3 pseudo t,  $J = 9.9$ ,  $9.2$  Hz in each, H-2, H-3, H-4),

$5.57$  (2H, br s,  $\text{NH}_2$ ),  $4.68$  (1H, dd,  $J = 11.9$ ,  $2.6$  Hz, H-6a),  $4.53$  (1H, dd,  $J = 11.9$ ,  $5.3$  Hz, H-

6b),  $4.41$  (1H, d,  $J = 9.9$  Hz, H-1),  $4.26$  (1H, ddd,  $J = 9.9$ ,  $5.3$ ,  $2.6$  Hz, H-5),  $3.81$  (3H, s,

OMe);  $^{13}\text{C}$  NMR (90 MHz,  $\text{CDCl}_3$ ):  $\delta = 166.1$ ,  $165.7$ ,  $165.3$ ,  $165.2$  (C=O),  $161.2$ ,  $156.0$  (Ar,

C=N),  $155.7$  (=CH),  $133.5$ - $127.4$ ,  $113.8$  (Ar),  $77.3$ ,  $76.4$ ,  $73.5$ ,  $70.5$ ,  $69.2$  (C-1-C-5),  $62.9$  (C-

6),  $55.2$  (OMe). MS-ESI ( $m/z$ ): calcd for  $\text{C}_{43}\text{H}_{37}\text{N}_3\text{O}_{10}$   $[\text{M}]^+$ : 755.25. Found: 755.3.

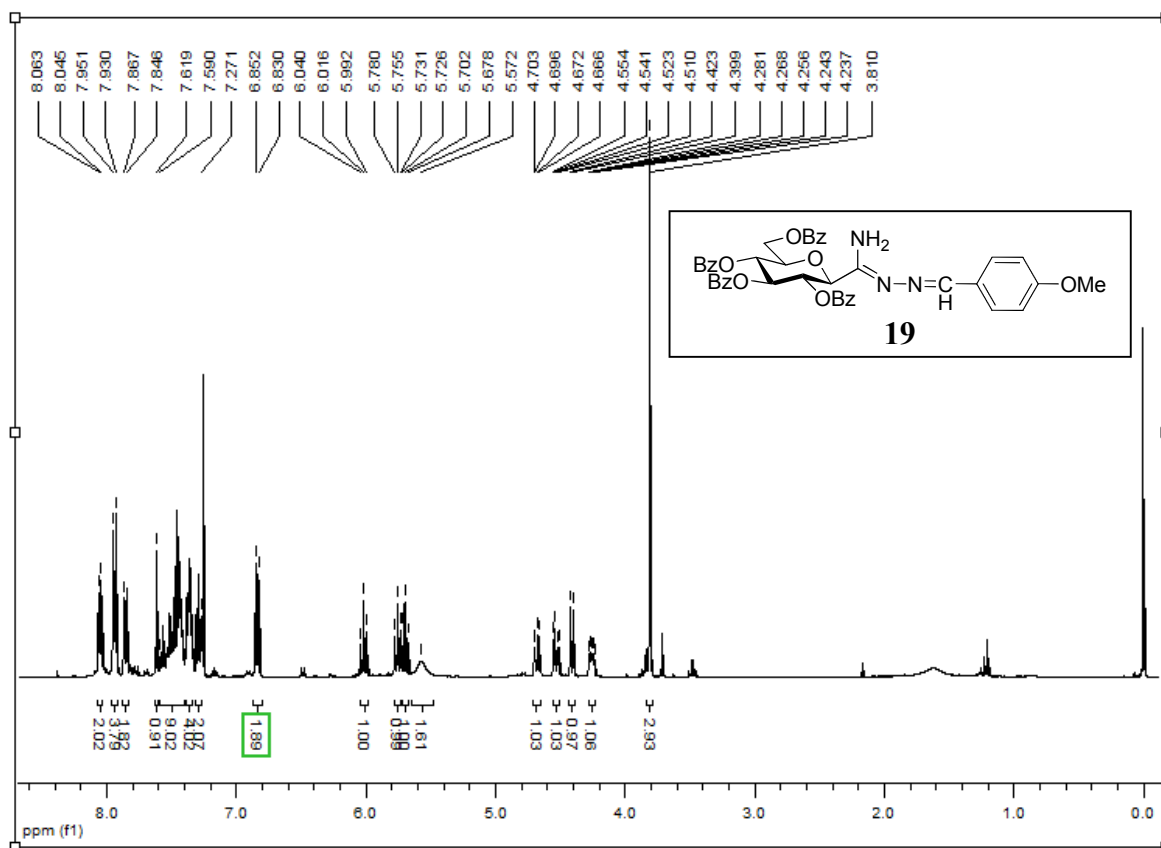

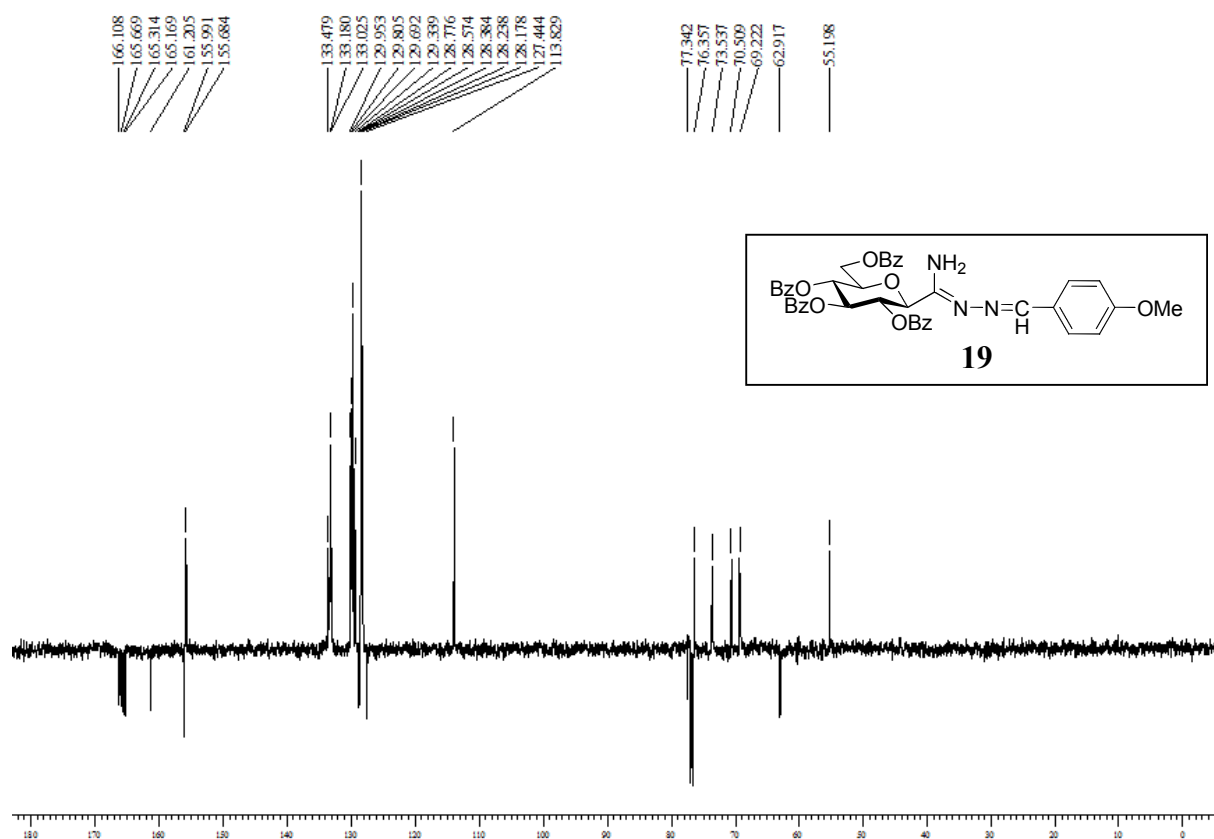

***N*<sup>1</sup>-(Pyren-1-ylmethylidene)-*C*-(2,3,4,6-tetra-*O*-benzoyl- $\beta$ -D-glucopyranosyl)-**

**formamidrazone (20)** Prepared from formamidrazone **14** (1.0 g, 1.57 mmol) and pyrene-1-carbaldehyde (**17**, 0.40 g, 1.73 mmol) according to **General procedure II**. Reaction time: 1 h. The product precipitated from the hot reaction mixture, was filtered, and used without further purification. Yield: 0.95 g (71%), yellow solid. Mp: 139-141 °C;  $[\alpha]_D = +84$  (c 0.50, CHCl<sub>3</sub>); <sup>1</sup>H NMR (360 MHz, CDCl<sub>3</sub>):  $\delta$  = 8.74 (1H, s, Ar), 8.53 (1H, d,  $J$  = 8.6 Hz, Ar), 8.20-7.26 (28H, m, Ar, =CH), 6.09 (1H, pseudo t,  $J$  = 9.2, 9.2 Hz, H-2 or H-3 or H-4), 5.83-5.75 (4H, m, H-2 and/or H-3 and/or H-4, NH<sub>2</sub>), 4.74 (1H, dd,  $J$  = 11.9, 2.6 Hz, H-6a), 4.58 (1H, dd,  $J$  = 11.9, 5.3 Hz, H-6b), 4.52 (1H, d,  $J$  = 9.9 Hz, H-1), 4.32 (1H, ddd,  $J$  = 9.2, 5.3, 2.6 Hz, H-5); <sup>13</sup>C NMR (90 MHz, CDCl<sub>3</sub>):  $\delta$  = 166.1, 165.7, 165.4, 165.2 (C=O), 156.7 (C=N), 154.1 (=CH), 133.5-122.3 (Ar), 77.2, 76.4, 73.5, 70.7, 69.3 (C-1 – C-5), 62.9 (C-6). MS-ESI (m/z): calcd for C<sub>52</sub>H<sub>40</sub>N<sub>3</sub>O<sub>9</sub><sup>+</sup> [M+H]<sup>+</sup>: 850.27. Found: 850.7.

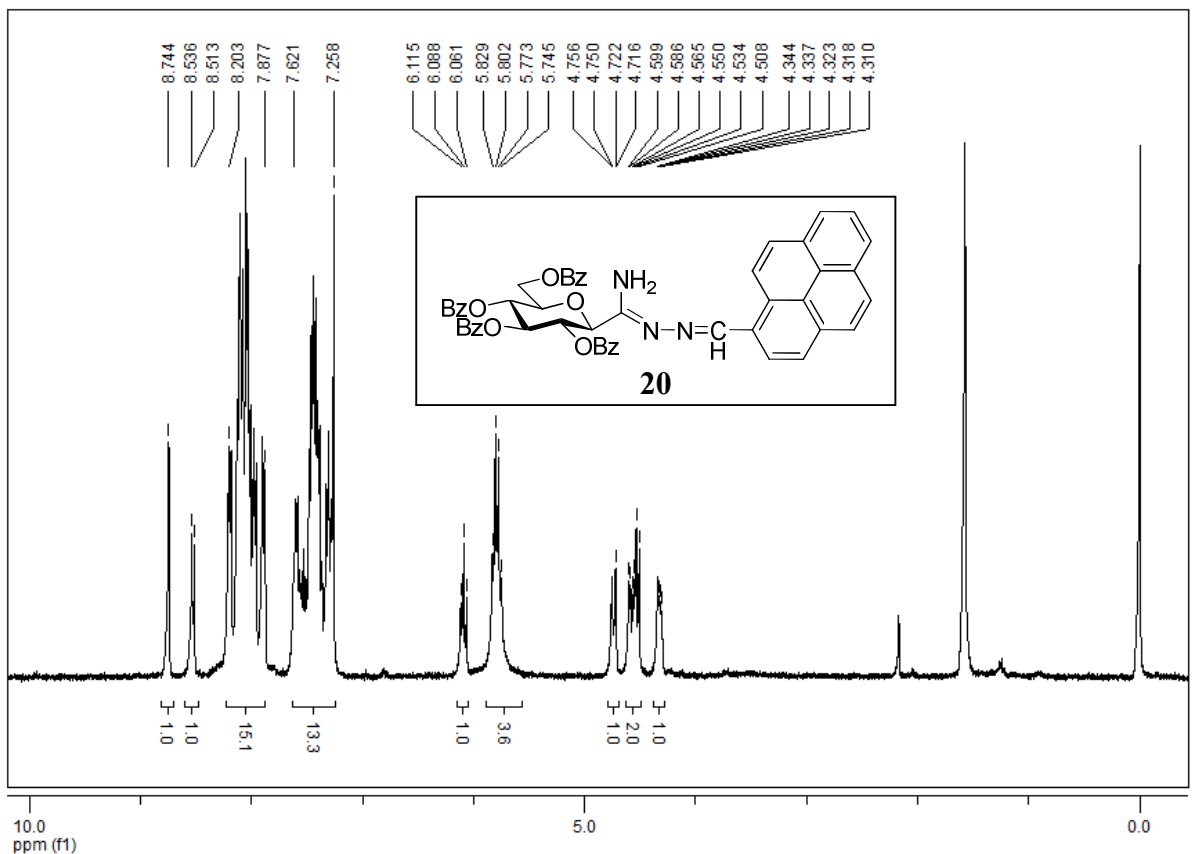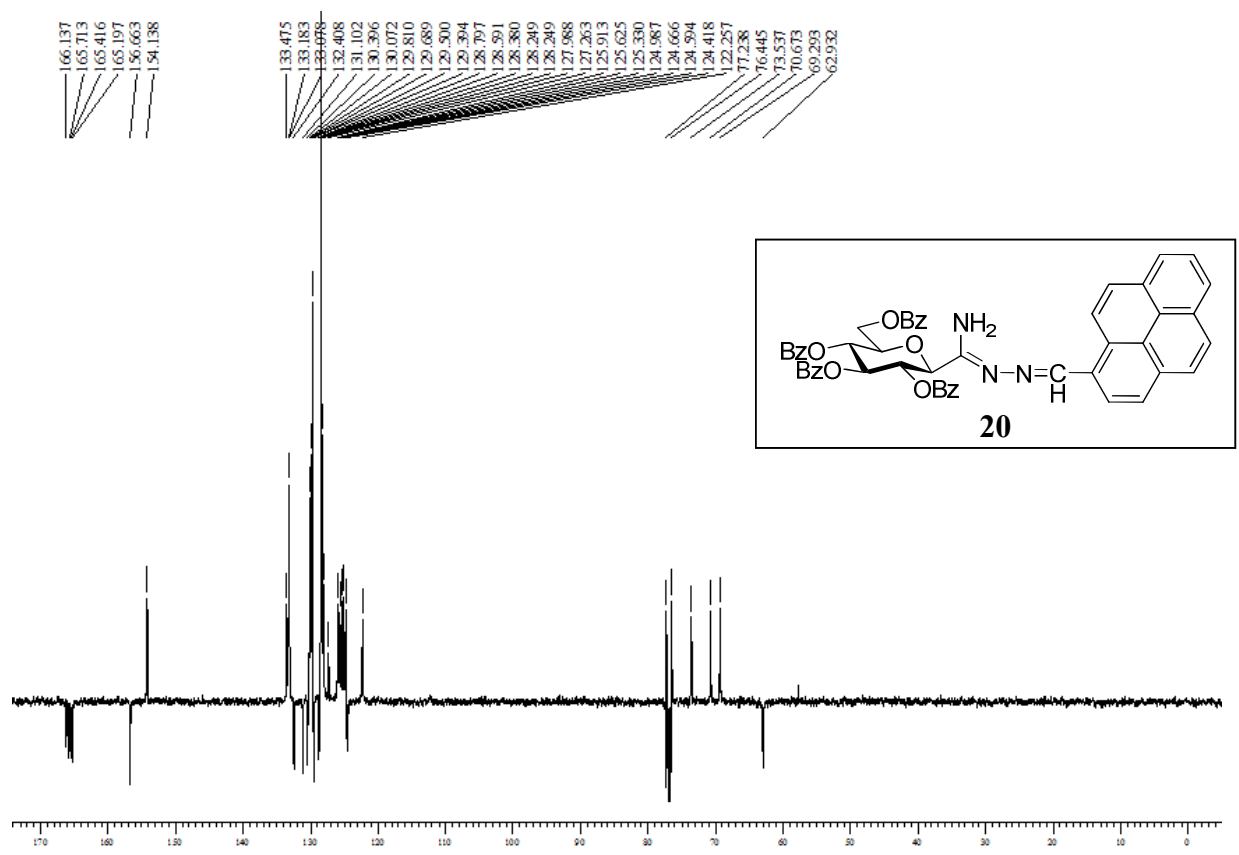



**General procedure III for the transformation of *N*'-arylidene-*C*-(2,3,4,6-tetra-*O*-benzoyl- $\beta$ -D-glucopyranosyl)formamidrazones (**18-20**) by PIDA**

To a solution of the corresponding arylidene amidrazone (**18-20**, 0.10 g) in dry CH<sub>2</sub>Cl<sub>2</sub> (3 mL) PIDA (2 equiv.) was added and the reaction mixture was stirred at rt. After disappearance of the starting material monitored by TLC (EtOAc/hexane = 1:1) the mixture was diluted with CH<sub>2</sub>Cl<sub>2</sub> (15 mL), extracted with water (10 mL), satd aq NaHCO<sub>3</sub> solution (10 mL), and then with water (10 mL). The organic phase was dried over MgSO<sub>4</sub>, filtered the solvent was evaporated under reduced pressure. The resulting products were separated by column chromatography.

**3-(4-Methoxyphenyl)-5-(2,3,4,6-tetra-*O*-benzoyl- $\beta$ -D-glucopyranosyl)-1,2,4-triazole **22****

From formamidrazone **19** according to **General procedure III**. Reaction time: 2 d. Purified by column chromatography (EtOAc/hexane = 2:3) to give cyanide **1** as the first then the title compound **22** as the second fraction.

Compound **1**: Yield: 60 mg (75%). <sup>1</sup>H and <sup>13</sup>C NMR data correspond to the reported spectra.<sup>1</sup>

Compound **22**: Yield: 13 mg (13%) colourless syrup. R<sub>f</sub>: 0.38 (EtOAc/hexane = 1:1); [ $\alpha$ ]<sub>D</sub> = -4 (c 0.45, CHCl<sub>3</sub>); <sup>1</sup>H NMR (360 MHz, CDCl<sub>3</sub>):  $\delta$  = 7.95-7.20 (22H, m, Ar), 6.84 (2H, d, *J* = 7.9 Hz, Ar), 6.02, 6.09, 5.93 (3 x 1H, 3 pseudo t, *J* = 9.9, 9.2 Hz in each, H-2, H-3, H-4), 5.24 (1H, d, *J* = 9.9 Hz, H-1), 4.66 (1H, dd, *J* = 12.6, 2.6 Hz, H-6a), 4.57 (1H, dd, *J* = 12.6, 4.6 Hz, H-6b), 4.42 (1H, d, *J* = 9.2, 4.6, 2.6 Hz, H-5) 3.79 (3H, s, OMe); MS-ESI (m/z): calcd for C<sub>43</sub>H<sub>36</sub>N<sub>3</sub>O<sub>10</sub><sup>+</sup> [M+H]<sup>+</sup>: 754.23. Found: 754.7.

**General procedure IV for the synthesis of *O*-peracylated *N*-arenecarboximidoyl-*C*-( $\beta$ -D-glycopyranosyl)carbohydrazonoyl bromides (24-29)**

An alkylidene amidrazone (**8-13**, 0.28 mmol) was dissolved in CH<sub>2</sub>Cl<sub>2</sub> (4 mL), then *N*-bromosuccinimide (0.05 g, 0.28 mmol) was added. The mixture was stirred at rt. When the reaction was complete (TLC, EtOAc/hexane = 1:2) the solvent was evaporated, and the residue was purified by column chromatography.

***N*-Aminocarboximidoyl-*C*-(2,3,4,6-tetra-*O*-benzoyl- $\beta$ -D-glucoopyranosyl)carbohydrazonoyl bromide (24)** Prepared from **8** (0.60 g, 0.90 mmol) and NBS (0.18 g, 0.99 mmol) according to **General procedure IV**. Purified by column chromatography (CHCl<sub>3</sub>/methanol = 12:1) to yield the title compound **24** as a yellow amorphous solid (0.20 g, 30%). *R*<sub>f</sub> 0.40 (CHCl<sub>3</sub>/methanol = 12:1); [ $\alpha$ ]<sub>D</sub> = +21 (c 0.32, CHCl<sub>3</sub>); <sup>1</sup>H NMR (400 MHz, CDCl<sub>3</sub>):  $\delta$  = 10.45 (br s, 1 H, NH), 9.35 (br s, 2 H, NH<sub>2</sub>), 8.04-7.23 (m, 20 H, Ar), 6.70 (br s, 1 H, NH), 6.12, 5.98, 5.63 (3 pseudo t, 3 H, *J* = 9.5 Hz, 3 H, H-2, H-3, H-4), 4.77 (d, *J* = 9.4 Hz, 1 H, H-1), 4.66 (dd, *J* = 1, 12.1 Hz, 1 H, H-6a), 4.53 (dd, *J* = 6.4, 12.1 Hz, 1 H, H-6b), 4.32 (m, 1 H, H-5) ppm. <sup>13</sup>C NMR (100 MHz, CDCl<sub>3</sub>):  $\delta$  = 166.0, 165.9, 165.7, 165.1 (CO), 155.4 (C=NH), 147.3 (C(=N)Br), 133.6-128.2 (Ar), 76.5, 74.0, 73.0, 69.2, 68.6 (C-1-C-5), 63.2 (C-6) ppm. Anal. Calcd. for C<sub>36</sub>H<sub>31</sub>N<sub>4</sub>O<sub>9</sub>Br (743.56): C, 58.56, H, 4.20; N, 7.53. Found: C, 58.47; H, 4.09; N, 7.65.

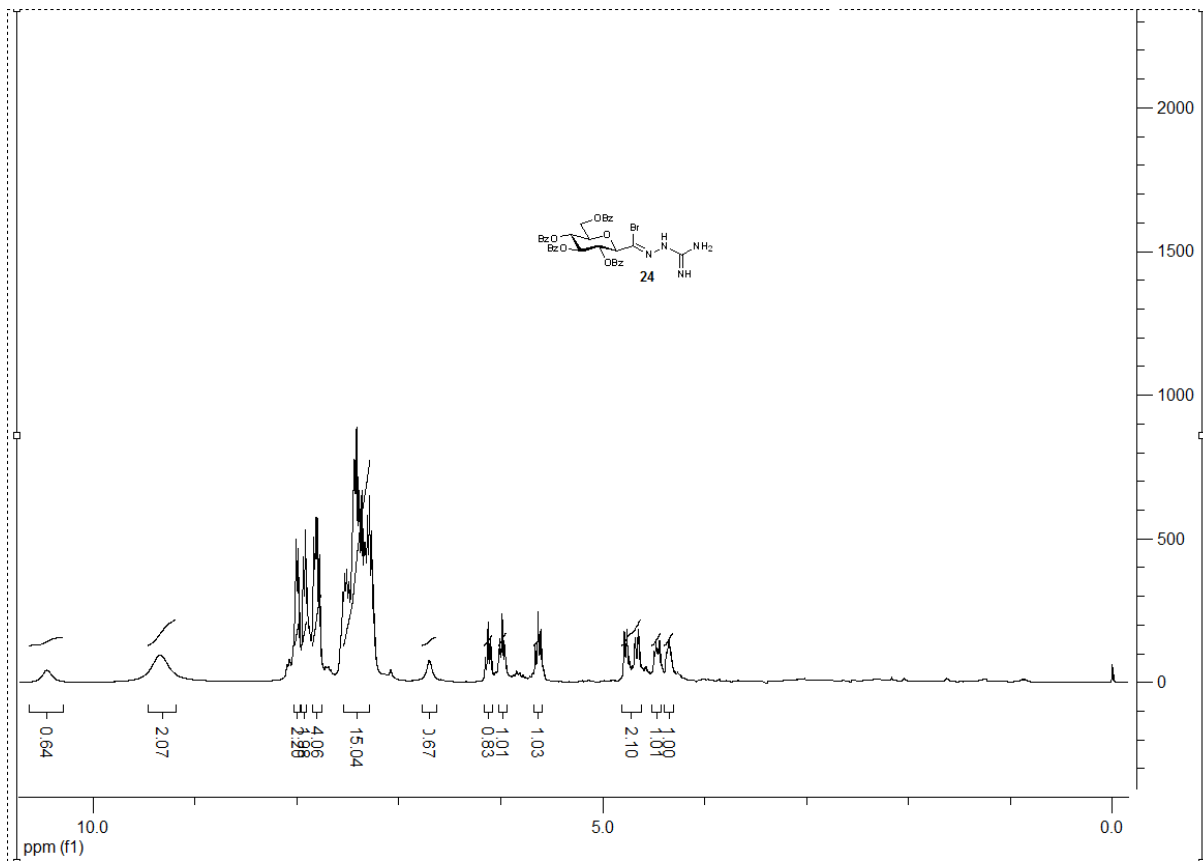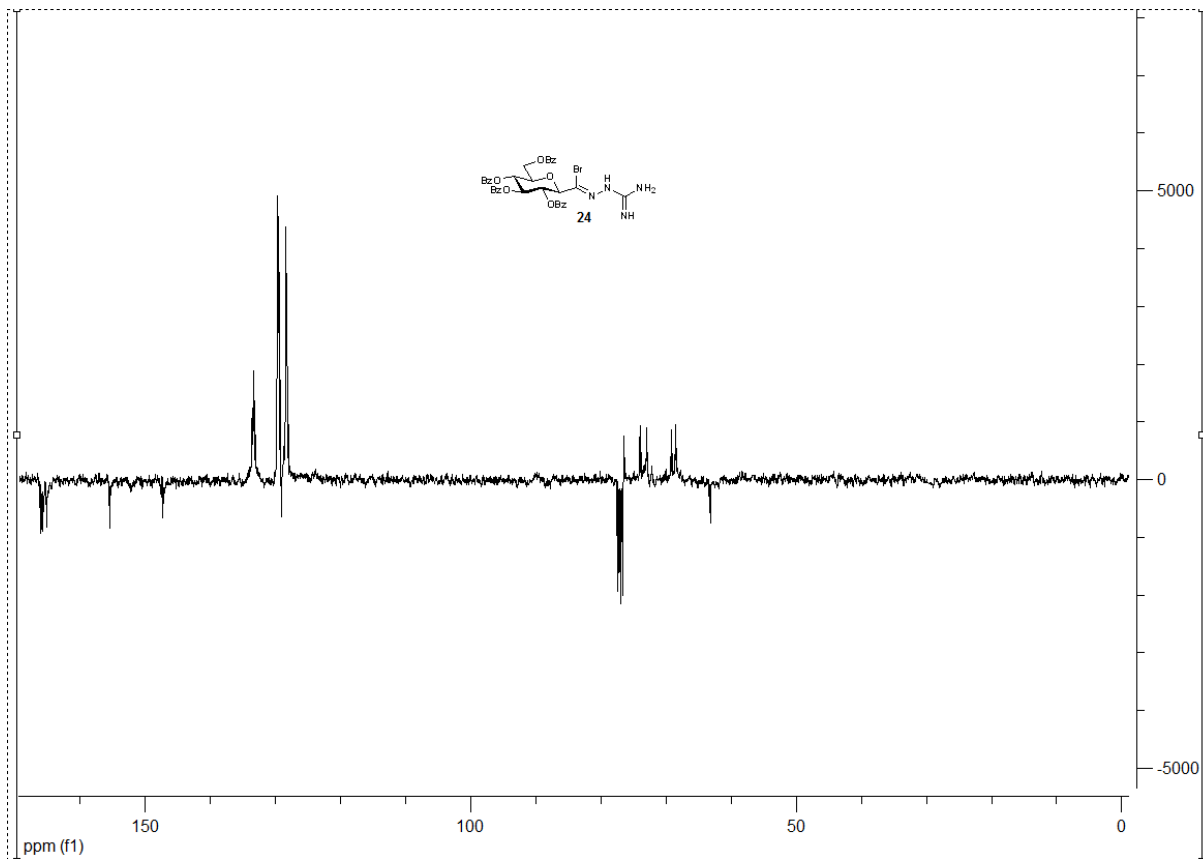

***N*-Benzenecarboximidoyl-*C*-(2,3,4,6-tetra-*O*-benzoyl- $\beta$ -D-glucopyranosyl)carbohydrazonoyl bromide (**25**)** Prepared from **9** (0.40 g, 0.55 mmol) and NBS (0.10 g, 0.55 mmol) according to **General procedure IV**. Purified by column chromatography (EtOAc/hexane = 1:2) to yield the title compound **25** as a white amorphous solid (0.33 g, 74%).  $R_f$  0.30 (EtOAc/hexane = 1:2);  $[\alpha]_D = +30$  (c 0.15, CHCl<sub>3</sub>); <sup>1</sup>H NMR (400 MHz, CDCl<sub>3</sub>):  $\delta$  = 8.06-7.24 (m, 26 H, Ar, NH), 6.30 (brs, 1 H, NH), 6.24, 5.99, 5.73 (3 pseudo t,  $J$  = 9.6 Hz, 3 H, H-2, H-3, H-4), 4.78 (d,  $J$  = 9.6 Hz, 1 H, H-1), 4.68 (dd,  $J$  = 2.5, 12.2 Hz, 1 H, H-6a), 4.53 (dd,  $J$  = 5.6, 12.2 Hz, 1 H, H-6b), 4.32 (ddd,  $J$  = 2.5, 5.6, 9.6 Hz, 1 H, H-5) ppm. <sup>13</sup>C NMR (100 MHz, CDCl<sub>3</sub>):  $\delta$  = 166.1, 166.0, 165.8, 165.2 (CO), 161.5 (C=NH), 133.4-127.0 (Ar, C(=N)Br), 82.3, 76.5, 74.3, 70.4, 69.6 (C-1-C-5), 63.2 (C-6) ppm. Anal. Calcd. for C<sub>42</sub>H<sub>34</sub>N<sub>3</sub>O<sub>9</sub>Br (804.64): C, 62.69, H, 4.26; N, 5.22. Found: C, 62.59; H, 4.15; N, 5.10.

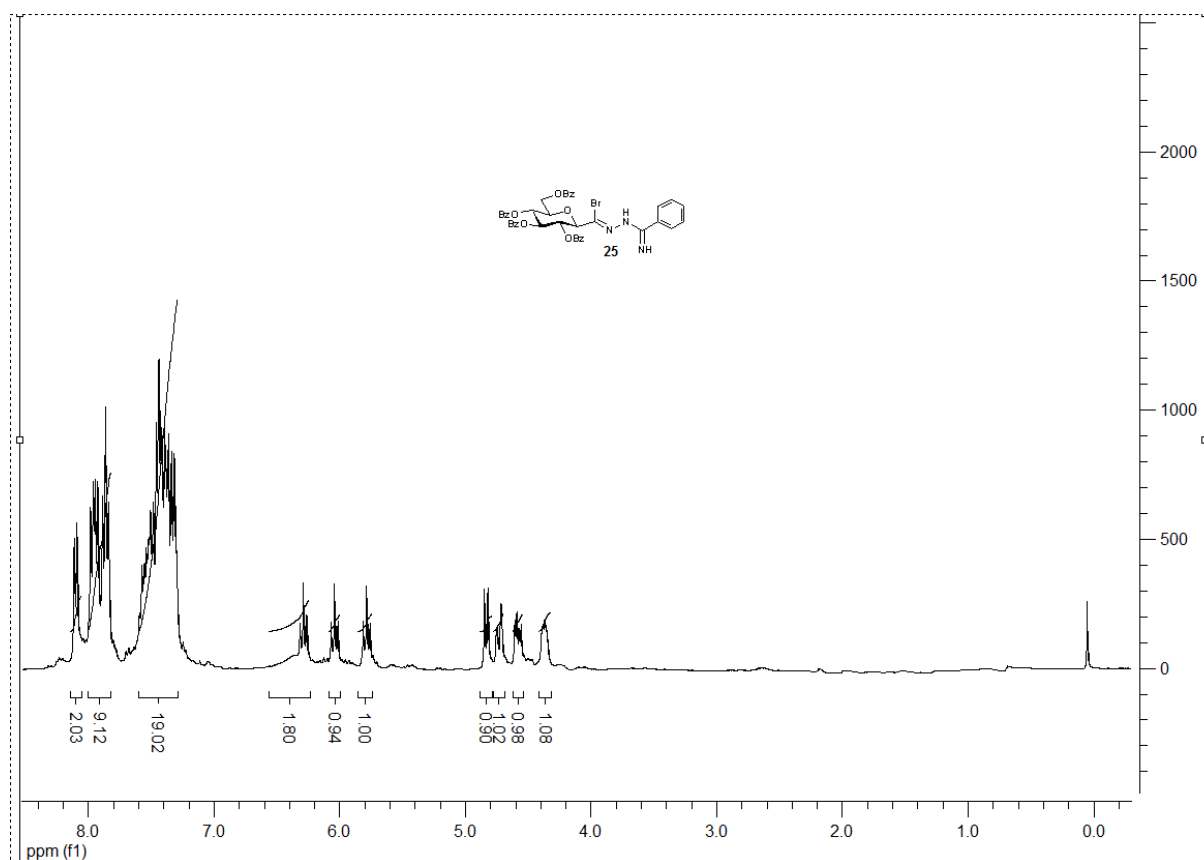

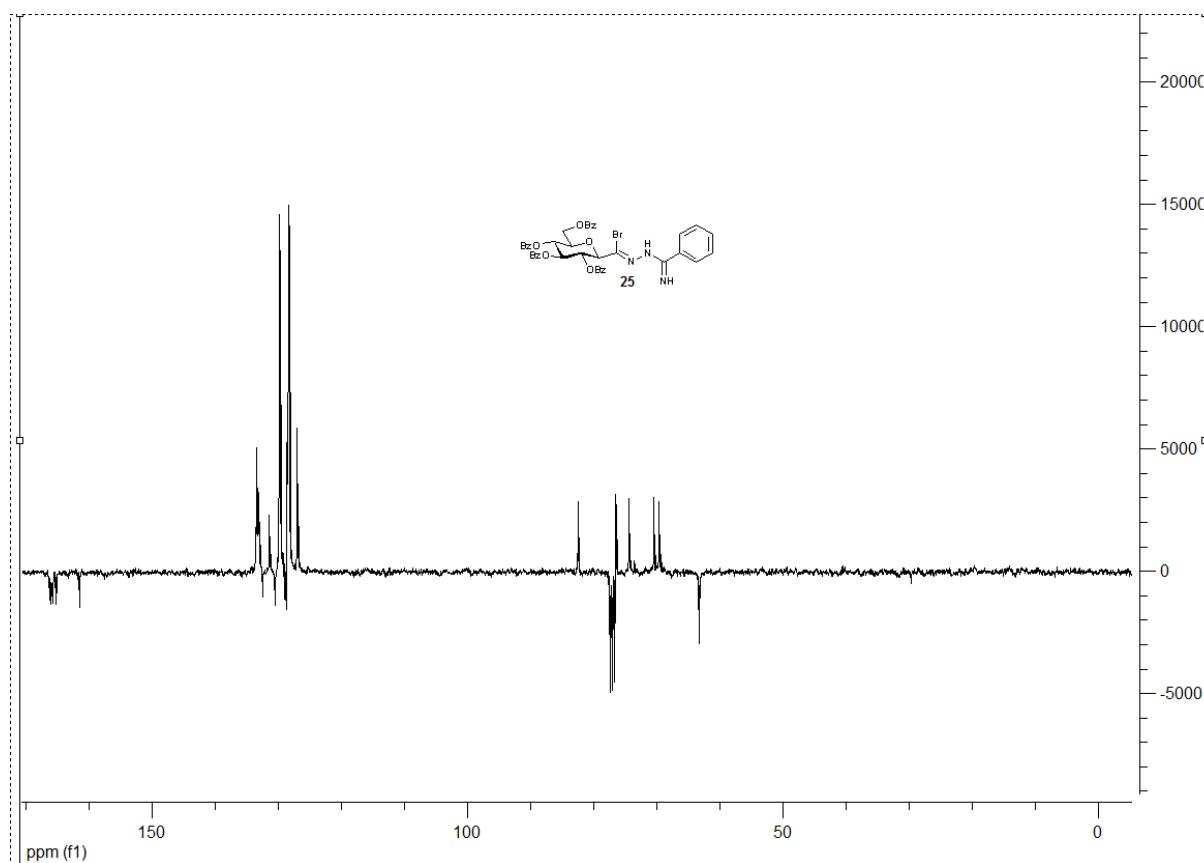

***N*-(Pyridine-2-carboximidoyl)-*C*-(2,3,4,6-tetra-*O*-benzoyl- $\beta$ -D-glucopyranosyl)-carbohydrazonoyl bromide (**26**)** Prepared from **10** (0.15 g, 0.21 mmol) and NBS (0.09 g, 0.41 mmol) according to **General procedure IV**. Purified by column chromatography (EtOAc/toluene = 1:8) to yield the title compound **26** as a white amorphous solid (0.11 g, 64%).  $R_f$  0.50 (EtOAc/toluene = 1:8);  $[\alpha]_D = +55$  (c 0.38, CHCl<sub>3</sub>); <sup>1</sup>H NMR (400 MHz, CDCl<sub>3</sub>):  $\delta$  = 8.52-7.25 (m, 24 H, Ar), 6.96 (1 br s, 1 H, NH), 6.60 (1 br s, 1 H, NH), 6.30, 6.00, 5.75 (3 pseudo t,  $J$  = 9.4, 9.6 Hz, 3 H, H-2, H-3, H-4), 4.76 (d,  $J$  = 9.6 Hz, 1 H, H-1), 4.70 (dd,  $J$  = 1.0, 12.2 Hz, 1 H, H-6a), 4.54 (dd,  $J$  = 5.3, 12.0 Hz, 1 H, H-6b), 4.41-4.18 (m, 1 H, H-5) ppm. <sup>13</sup>C NMR (100 MHz, CDCl<sub>3</sub>):  $\delta$  = 166.1, 165.9, 165.8, 165.1 (CO), 158.8 (C=NH), 149.1, 148.2, 136.7, 133.4-122.3 (Ar, C(=N)Br), 82.4, 76.5, 74.4, 70.4, 69.6 (C-1-C-5), 63.2 (C-6) ppm. Anal. Calcd. for C<sub>41</sub>H<sub>34</sub>N<sub>3</sub>O<sub>9</sub>Br (805.63): C, 64.12, H, 4.13; N, 6.95. Found: C, 64.24; H, 4.26; N, 6.83.

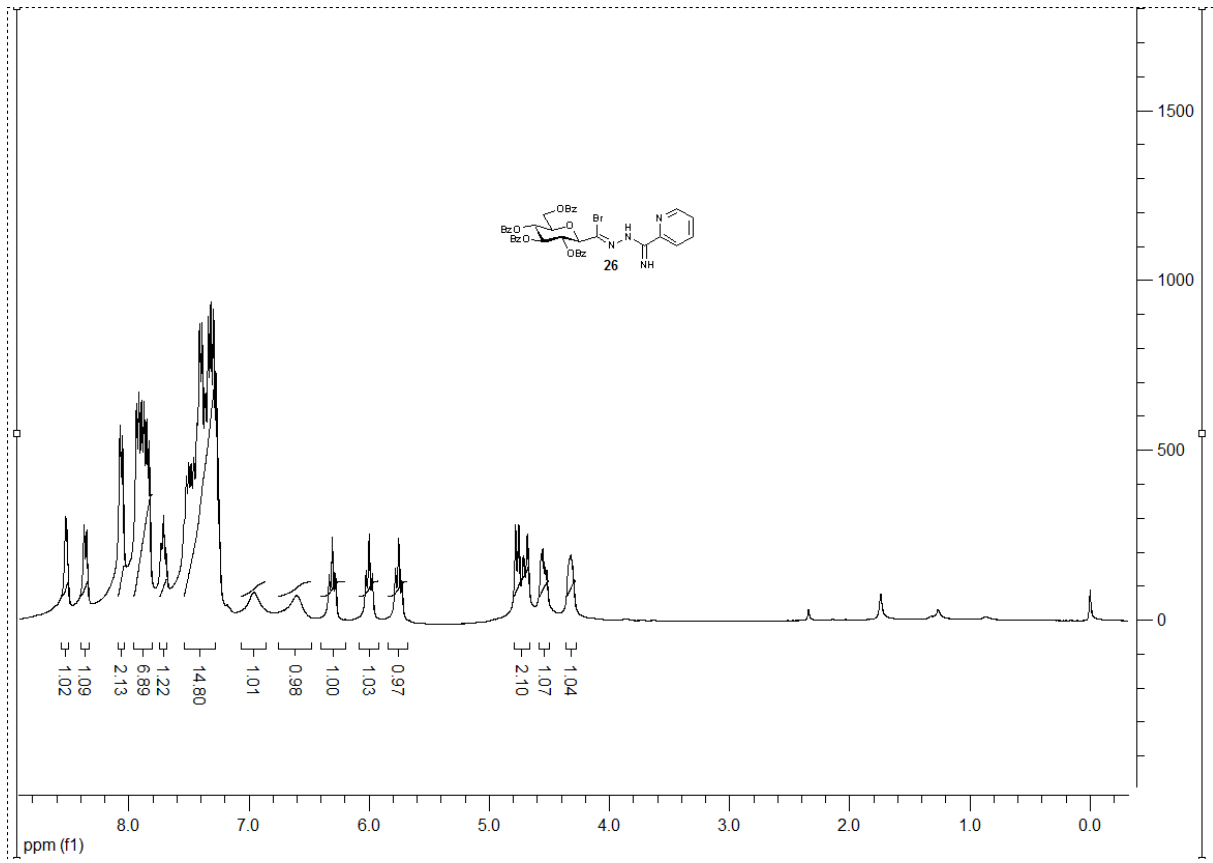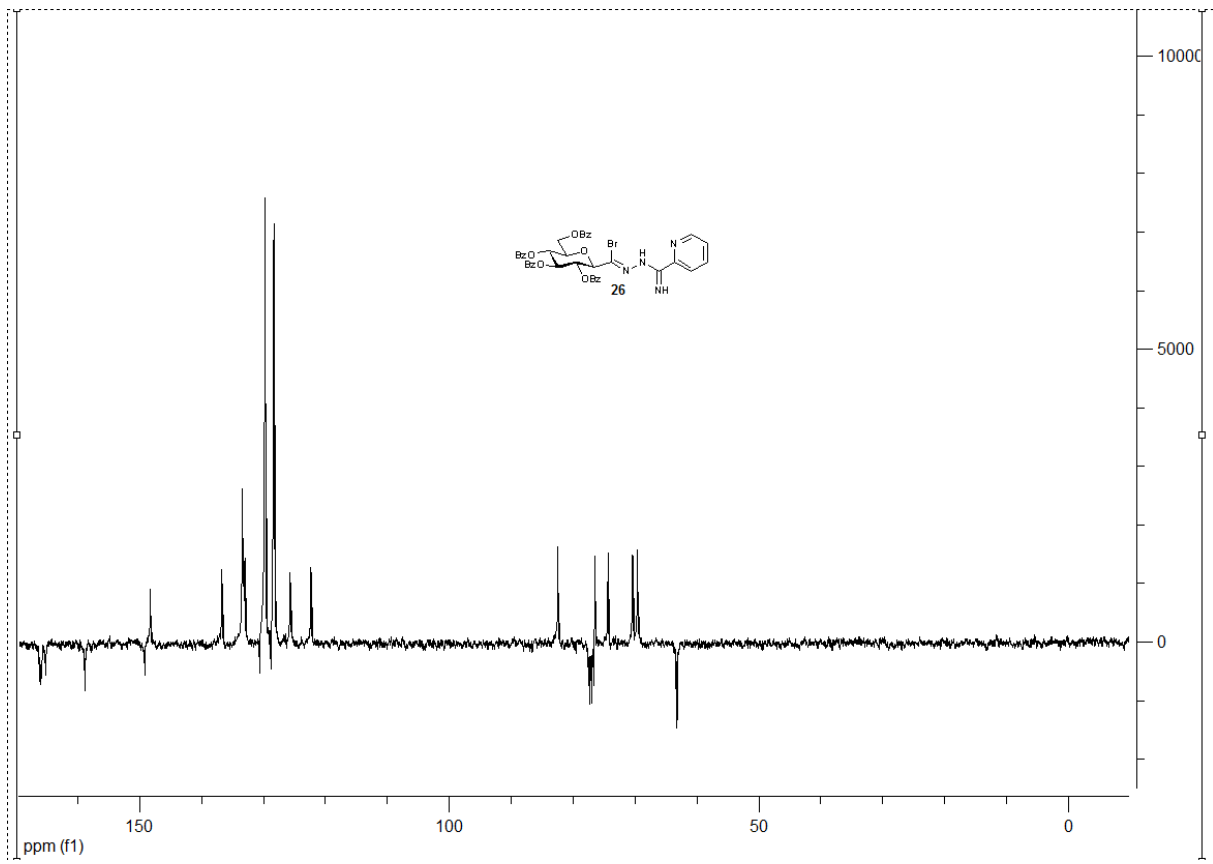

***N*-(Naphthalene-2-carboximidoyl)-*C*-(2,3,4,6-tetra-*O*-benzoyl- $\beta$ -D-glucopyranosyl)carbohydrazonoyl bromide (**27**)** Prepared from **11** (0.30 g, 0.39 mmol) and NBS (0.08 g, 0.39 mmol) according to **General procedure IV**. Purified by column chromatography (EtOAc/hexane = 1:2) to yield the title compound **27** as a pale yellow amorphous solid (0.23 g, 70%).  $R_f$  0.40 (EtOAc/hexane = 1:2);  $[\alpha]_D = +17$  (c 0.07, CHCl<sub>3</sub>); <sup>1</sup>H NMR (400 MHz, CDCl<sub>3</sub>):  $\delta$  = 8.21-7.21 (m, 28 H, Ar, NH), 6.31 (pseudo t,  $J$  = 9.5, 9.7 Hz, 1 H, H-2 or H-3 or H-4), 6.14 (brs, 1 H, NH), 6.00, 5.76 (2 pseudo t,  $J$  = 9.6, 9.8 Hz, 2 H, H-2 and/or H-3 and/or H-4), 4.77 (d,  $J$  = 9.8 Hz, 1 H, H-1), 4.69 (dd,  $J$  = 2.4, 12.2 Hz, 1 H, H-6a), 4.54 (dd,  $J$  = 5.2, 12.2 Hz, 1 H, H-6b), 4.29 (ddd,  $J$  = 2.4, 5.2, 9.6 Hz, 1 H, H-5) ppm. <sup>13</sup>C NMR (100 MHz, CDCl<sub>3</sub>):  $\delta$  = 166.0, 165.9, 165.8, 165.1 (CO), 161.4 (C=NH), 134.5-123.8 (Ar, C(=N)Br), 82.4, 76.3, 74.4, 70.4, 69.5 (C-1-C-5), 63.1 (C-6) ppm. ESI-MS (positive mode)  $m/z$  calcd. for C<sub>46</sub>H<sub>37</sub>N<sub>3</sub>O<sub>9</sub>Br<sup>+</sup> (854.171) [M+H]<sup>+</sup>, Found: 854.168, 856.167.

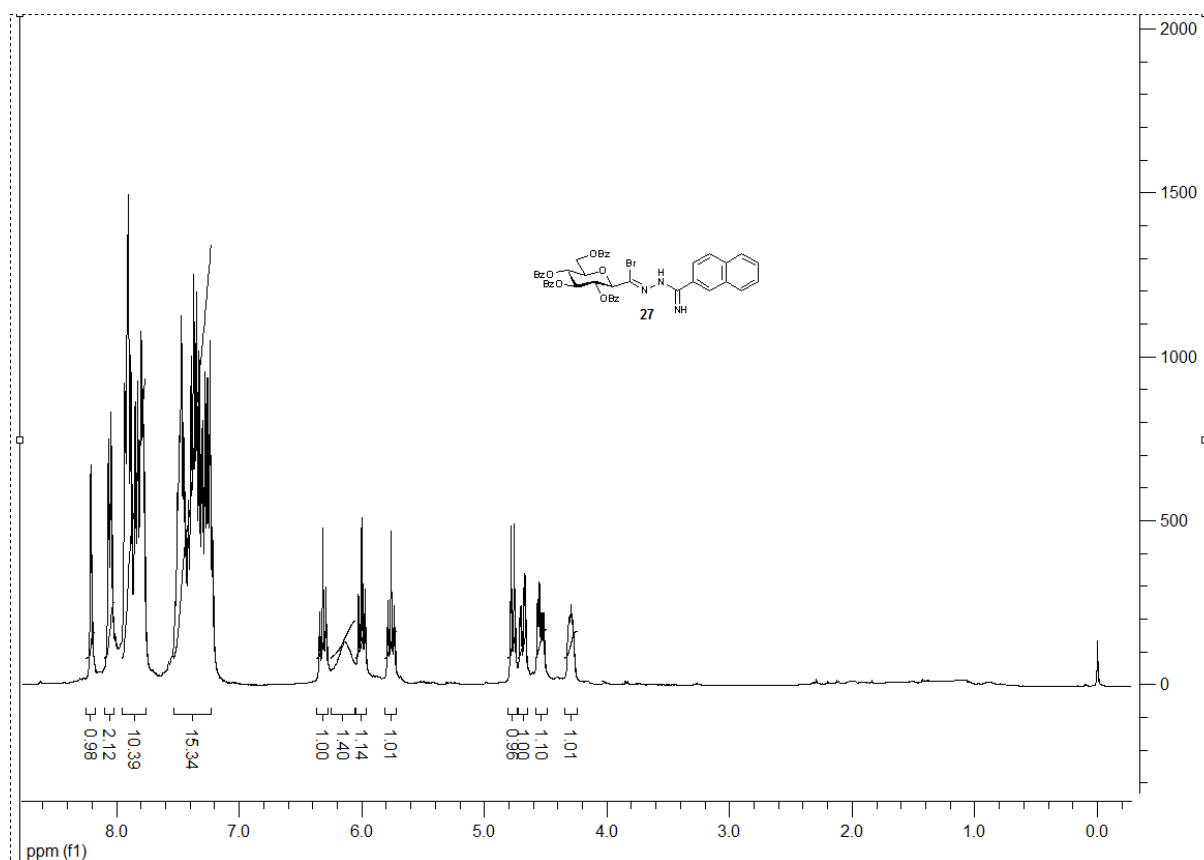

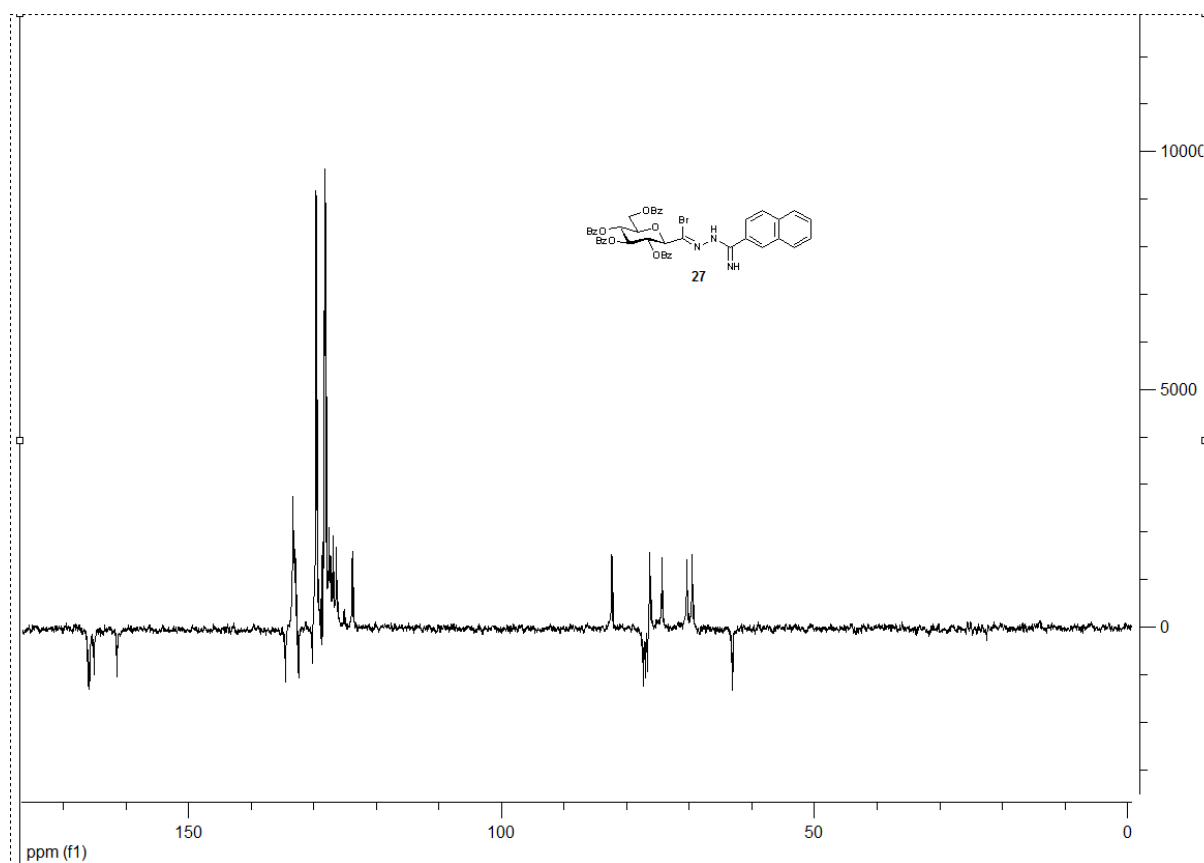

***N*-Benzenecarboximidoyl-*C*-(2,3,4,6-tetra-*O*-acetyl- $\beta$ -*D*-galactopyranosyl)carbohydrazoneyl bromide (**29**)** Prepared from **13** (0.35 g, 0.73 mmol) and NBS (0.13 g, 0.73 mmol) according to **General procedure IV**. Purified by column chromatography (EtOAc/hexane = 1:1) to yield the title compound **29** as a white amorphous solid (0.27 g, 66%).  $R_f$  0.40 (EtOAc/hexane = 1:1);  $[\alpha]_D = -8$  (c 0.85, CHCl<sub>3</sub>); <sup>1</sup>H NMR (400 MHz, CDCl<sub>3</sub>):  $\delta$  = 7.86 (d,  $J$  = 7.3 Hz, 2 H, Ar), 7.56-7.38 (m, 3 H, Ar), 5.93 (very br s, NH<sub>2</sub>), 5.86 (pseudo t,  $J$  = 9.8 Hz, 1 H, H-2), 5.47 (d,  $J$  = 2.6 Hz, 1 H, H-4), 5.11 (dd,  $J$  = 3.1, 10.0 Hz, 1 H, H-3), 4.36 (d,  $J$  = 9.6 Hz, 1 H, H-1), 4.24 (dd,  $J$  = 6.8, 11.1 Hz, 1 H, H-6a), 4.15 (dd,  $J$  = 6.5, 11.1 Hz, 1 H, H-6b), 4.07 (pt,  $J$  = 6.5 Hz, 1 H, H-5), 2.19, 2.07, 2.01 (3 s, 12 H, CH<sub>3</sub>) ppm. <sup>13</sup>C NMR (100 MHz, CDCl<sub>3</sub>):  $\delta$  = 170.4, 170.3, 170.2, 170.1 (CO), 161.5 (C=NH), 132.7, 131.4, 130.9, 128.6, 127.0 (Ar), 82.5, 74.7, 72.1, 67.3 (C-1-C-5), 61.9 (C-6) ppm. Anal. Calcd. for C<sub>22</sub>H<sub>26</sub>N<sub>3</sub>O<sub>9</sub>Br (556.36): C, 47.49, H, 4.71; N, 7.55. Found: C, 47.39; H, 4.63; N, 7.63.



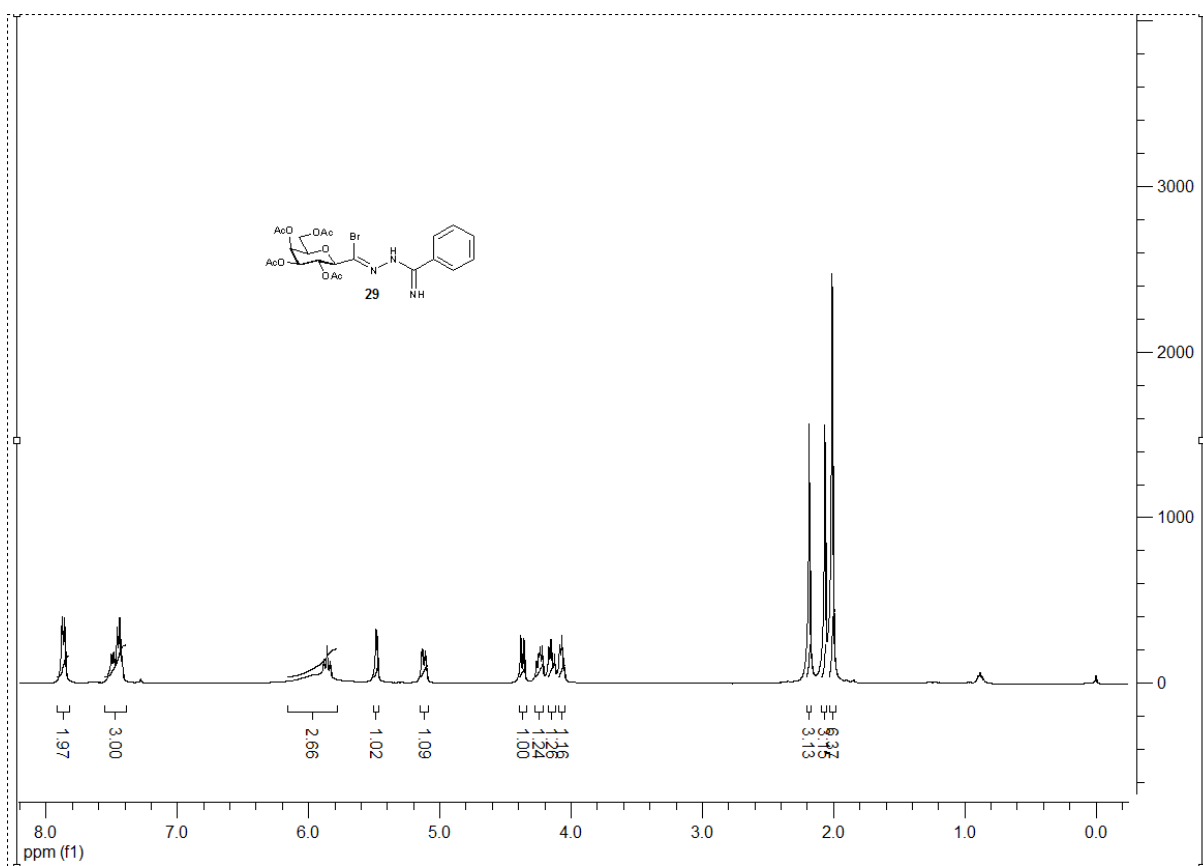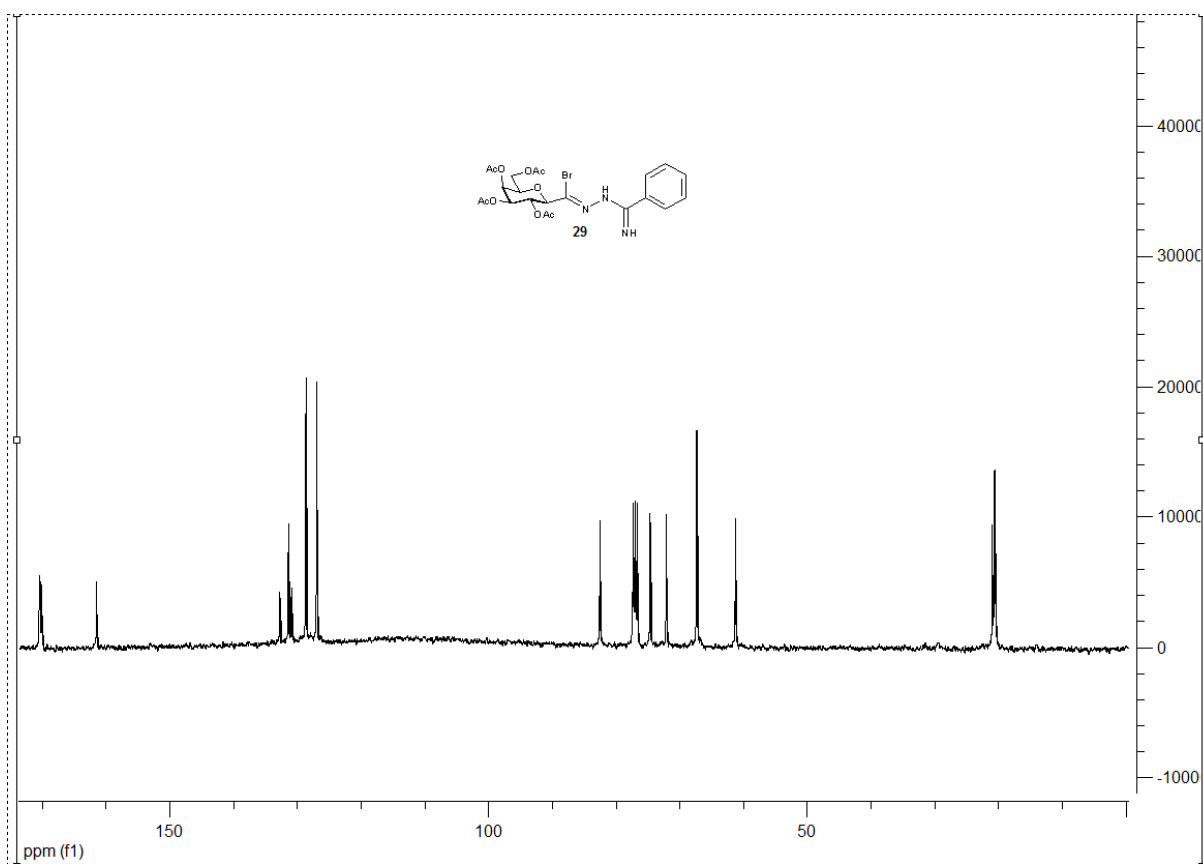

**General procedure V for the synthesis of *O*-peracylated 5-( $\beta$ -D-glycopyranosyl)-3-substituted-1,2,4-triazoles (21, 30-33)**

A carbohydrazonoyl bromide (**24-29**, 0.14 mmol) was dissolved in glacial AcOH (3 mL), then NH<sub>4</sub>OAc (0.012 g, 0.15 mmol) was added. The mixture was stirred and heated at 110 °C. When the reaction was complete (TLC, EtOAc/toluene = 2:7) the mixture was diluted with H<sub>2</sub>O (6 mL), and washed with CH<sub>2</sub>Cl<sub>2</sub> (3 x 7 mL). The organic layer was separated and washed with cold, saturated NaHCO<sub>3</sub> solution (8 mL), and H<sub>2</sub>O (8 mL), dried (MgSO<sub>4</sub>), and evaporated under reduced pressure. The residue was purified by column chromatography.

**General procedure VI for the synthesis of *O*-peracylated 5-( $\beta$ -D-glycopyranosyl)-3-substituted-1,2,4-triazoles (21, 30)**

A carbohydrazonoyl bromide (**24-26**, 0.10 mmol) was dissolved in anhydrous pyridine (6 mL). The mixture was stirred and heated at 110 °C. The reaction was monitored by TLC (EtOAc/toluene = 1:3). When the reaction was complete the solvent was evaporated under reduced pressure. The residue was purified by column chromatography.

**3-Phenyl-5-(2,3,4,6-tetra-*O*-benzoyl- $\beta$ -D-glycopyranosyl)-1,2,4-triazole (21)** Prepared from **25** (0.04 g, 0.05 mmol) according to **General procedure V**. Purified by column chromatography (EtOAc/toluene = 1:3) to yield the title compound **21** as a white solid (0.021 g, 56%).

Prepared from **25** (0.1 g, 0.12 mmol) according to **General procedure VI**. Purified by column chromatography (EtOAc/toluene = 1:3) to yield the title compound **21** as a white solid (0.05 g, 58%).

Characterization data correspond to the lit. values.<sup>5</sup> The original spectra are available in the supporting information of that publication at <http://dx.doi.org/10.1016/j.tet.2013.09.099>.

**3-(Pyridin-2-yl)-5-(2,3,4,6-tetra-*O*-benzoyl- $\beta$ -D-glucopyranosyl)-1,2,4-triazole (30):**

Prepared from **26** (0.25 g, 0.31 mmol) according to **General procedure V**. Purified by column chromatography (EtOAc/toluene = 1:3) to yield the title compound **30** as a white solid (0.07 g, 32%).

Prepared from **26** (0.11 g, 0.10 mmol) according to **General procedure VI**. Purified by column chromatography (EtOAc-toluene 1:3) to yield the title compound **30** as a white solid (0.05 g, 53%).

Characterization data correspond to the lit. values.<sup>5</sup> The original spectra are available in the supporting information of that publication at <http://dx.doi.org/10.1016/j.tet.2013.09.099>.

**3-(Naphthalen-2-yl)-5-(2,3,4,6-tetra-*O*-benzoyl- $\beta$ -D-glucopyranosyl)-1,2,4-triazole (31)**

Prepared from **27** (0.12 g, 0.14 mmol) according to **General procedure V**. Purified by column chromatography (EtOAc/toluene = 2:7) to yield the title compound **31** as a white solid (0.06 g, 55%).

Characterization data correspond to the lit. values.<sup>5</sup> The original spectra are available in the supporting information of that publication at <http://dx.doi.org/10.1016/j.tet.2013.09.099>.

**3-Phenyl-5-(2,3,4-tri-*O*-benzoyl- $\beta$ -D-xylopyranosyl)-1,2,4-triazole (32)** Prepared from **28**

(crude product, 0.23 g, 0.35 mmol) according to **General procedure V**. Purified by column chromatography (EtOAc/hexane = 2:3) to yield the title compound **32** as a white solid (0.07 g, 32%). m.p. 173-175 °C;  $[\alpha]_D = -48$  (c 0.50, CHCl<sub>3</sub>); <sup>1</sup>H NMR (400 MHz, CDCl<sub>3</sub>):  $\delta$  = 12.60 (s, 1 H, NH-triazole), 8.08-7.76 (m, 8 H, Ar), 7.50-7.20 (m, 12 H, Ar), 6.15-5.97 (m, 2 H, H-2, H-3), 5.62-5.47 (m, 1 H, H-4), 5.06 (d,  $J = 9.1$  Hz, 1 H, H-1), 4.52 (dd,  $J = 5.4, 11.3$  Hz, 1 H, H-5a), 3.76 (pseudo t,  $J = 10.6$  Hz, 1 H, H-5b) ppm. <sup>13</sup>C NMR (100 MHz, CDCl<sub>3</sub>):  $\delta$  =

165.9, 165.5, 165.3 (CO), 158.2, 158.0 (C-3-, C-5-triazole), 133.4-126.5 (Ar), 74.5, 73.6, 71.2, 70.0 (C-1-C-4), 67.2 (C-5) ppm. Anal. Calcd. for C<sub>34</sub>H<sub>27</sub>N<sub>3</sub>O<sub>7</sub> (589.59): C, 69.26; H, 4.62; N, 7.13. Found: C, 69.11; H, 4.51; N, 7.23.

**3-Phenyl-5-(2,3,4,6-tetra-O-acetyl-β-D-galactopyranosyl)-1,2,4-triazole (33)** Prepared from **29** (0.13 g, 0.23 mmol) according to **General procedure V**. Purified by column chromatography (EtOAc/hexane = 2:3) to yield the title compound **33** as a colourless amorphous solid (0.07 g, 64%). *R<sub>f</sub>* 0.22 (EtOAc/hexane = 1:1); [α]<sub>D</sub> = +22 (c 0.32, CHCl<sub>3</sub>); <sup>1</sup>H NMR (400 MHz, CDCl<sub>3</sub>): δ = 8.01-7.94 (m, 2 H, Ar), 7.44-7.36 (m, 3 H, Ar), 5.73 (pseudo t, *J* = 10.0 Hz, 1 H, H-2), 5.54 (d, *J* = 3.3 Hz, 1 H, H-4), 5.25 (dd, *J* = 3.1, 10.0 Hz, 1 H, H-3), 4.81 (d, *J* = 9.9 Hz, 1 H, H-1), 4.17-4.13 (m, 3 H, H-5, H-6a, H-6b), 2.08, 2.01, 1.96 (3 s, 12 H, CH<sub>3</sub>) ppm. <sup>13</sup>C NMR (100 MHz, CDCl<sub>3</sub>): δ 170.4, 170.3, 170.1, 170.0 (CO), 158.0, 157.5 (C-3-, C-5-triazole), 130.0, 128.7, 128.0, 126.4 (Ar), 74.9, 74.0, 71.9, 67.9, 67.4 (C-1-C-5), 61.5 (C-6) ppm. Anal. Calcd. for C<sub>22</sub>H<sub>25</sub>N<sub>3</sub>O<sub>9</sub> (475.45): C, 55.58; H, 5.30; N, 8.84. Found: C, 55.41; H, 5.19; N, 8.93.

### General procedure VII for the synthesis of *N*<sup>l</sup>-arylidene-benzamidrazones (35)

Ethylbenzimidate (**34**, 1.01 mmol) was dissolved in dry EtOH (10mL), and the corresponding aryl hydrazone (1.01 mmol) was added. The reaction mixture was stirred and heated at reflux temperature overnight. The reaction was monitored by TLC (EtOAc/hexane = 1:3). When the reaction was complete the solvent was evaporated under reduced pressure, and the residue was crystallized from ethanol-hexane mixture.

### General procedure VIII for the synthesis of *N*<sup>l</sup>-arylidene-arenecarboxamidrazones (35, 36)

An arenecarboxamidrazone (**5**<sup>5</sup> or **6**<sup>6</sup>, 1.1 mmol) was dissolved in dry EtOH (8 mL), and the corresponding aromatic aldehyde (1.21 mmol) was added. The reaction mixture was stirred and heated at reflux temperature. The reaction was monitored by TLC (EtOAc/hexane = 1:2). When the reaction was complete the solvent was evaporated under reduced pressure, and the residue was crystallized from ethanol-hexane mixture.

*N*<sup>l</sup>-(4-Fluorobenzylidene)-benzamidrazone (**35a**) Prepared from ethylbenzimidate (**34**, 0.15 g, 1.01 mmol) and 4-fluorobenzaldehyde hydrazone (0.14 g, 1.01 mmol) according to

**General procedure VII** to yield **35a** as a white solid (0.21 g, 86%).

Prepared from benzamidrazone (**5**, 0.30 g, 2.22 mmol) and 4-fluorobenzaldehyde (0.26 mL, 2.44 mmol) according to **General procedure VIII** to yield **35a** as a white solid (0.50 g, 93%). m.p. 158-160 °C; <sup>1</sup>H NMR (400 MHz, DMSO-d<sub>6</sub>): δ = 8.46 (s, 1 H, CH=N), 8.18-7.80 (m, 4 H, Ar), 7.68-7.20 (m, 5 H, Ar), 7.10 (brs, 2 H, 2 NH) ppm. <sup>13</sup>C NMR (100 MHz, DMSO-d<sub>6</sub>): δ = 163.4 (d, *J* = 246.4 Hz, Ar), 159.3 (C=NH), 152.4 (CH=N), 134.3, 132.7, 130.7, 130.2 (d, *J* = 8.0 Hz), 128.6, 127.2, 116.0 (d, *J* = 21.6 Hz) (Ar) ppm. Anal. Calcd. for C<sub>14</sub>H<sub>12</sub>N<sub>3</sub>F (241.26): C, 69.70; H, 5.01; N, 17.42. Found: C, 69.82; H, 5.14; N, 17.30.

***N*<sup>1</sup>-(3-Chlorobenzylidene)-benzamidrazone (35b):** Prepared from benzamidrazone (**5**, 0.30 g, 2.22 mmol) and 3-chlorobenzaldehyde (0.28 mL, 2.44 mmol) according to **General procedure VIII** to yield **35b** as a white solid (0.46 g, 81%). m.p. 136-138 °C; <sup>1</sup>H NMR (400 MHz, DMSO-d<sub>6</sub>): δ = 8.44 (s, 1 H, CH=N), 8.09 (s, 1 H, Ar), 7.96 (d, *J* = 6.8 Hz, 2 H, Ar), 7.86-7.75 (m, 1 H, Ar), 7.54-7.36 (m, 5 H, Ar), 7.21 (brs, 2 H, 2 NH) ppm. <sup>13</sup>C NMR (100 MHz, DMSO-d<sub>6</sub>): δ = 159.3 (C=NH), 151.4 (CH=N), 137.9, 133.7, 133.5, 130.3, 130.2, 129.1, 128.1, 126.8, 126.6, 126.5 (Ar) ppm. Anal. Calcd. for C<sub>14</sub>H<sub>12</sub>N<sub>3</sub>Cl (257.72): C, 65.25; H, 4.69; N, 16.30. Found: C, 65.12; H, 4.79; N, 16.19.

***N*<sup>1</sup>-(4-Bromobenzylidene)-benzamidrazone (35c):** Prepared from ethylbenzimidate (**34**, 0.15 g, 1.01 mmol) and 4-bromobenzaldehyde hydrazone (0.20 g, 1.01 mmol) according to **General procedure VII** to yield **35c** as a white solid (0.12 g, 39%).

Prepared from benzamidrazone (**5**, 0.20 g, 1.48 mmol) and 4-bromobenzaldehyde (0.30 g, 1.63 mmol) according to **General procedure VIII** to yield **35c** as a white solid (0.38 g, 85%). m.p. 154-156 °C; <sup>1</sup>H NMR (400 MHz, DMSO-d<sub>6</sub>): δ = 8.43 (s, 1 H, CH=N), 7.95 (d, *J* = 6.5 Hz, 2 H, Ar), 7.87 (d, *J* = 8.0 Hz, 2 H, Ar), 7.62 (d, *J* = 8.0 Hz, 2 H, Ar), 7.54-7.40 (m, 3 H, Ar), 7.14 (brs, 2 H, 2 NH) ppm. <sup>13</sup>C NMR (100 MHz, DMSO-d<sub>6</sub>): δ 159.0 (C=NH), 151.8 (CH=N), 134.9, 133.7, 131.4, 130.3, 129.5, 128.1, 126.7, 122.8 (Ar) ppm. Anal. Calcd. for C<sub>14</sub>H<sub>12</sub>N<sub>3</sub>Br (302.17): C, 55.65; H, 4.00; N, 13.91. Found: C, 55.55; H, 4.11; N, 13.98.

***N*<sup>1</sup>-(4-Methylbenzylidene)-benzamidrazone (35d):** Prepared from benzamidrazone (**5**, 0.30 g, 2.22 mmol) and 4-methylbenzaldehyde (0.29 mL, 2.44 mmol) according to **General procedure VIII** to yield **35d** as a white solid (0.43 g, 82%). m.p. 197-199 °C; <sup>1</sup>H NMR (400 MHz, DMSO-d<sub>6</sub>): δ = 8.41 (s, 1 H, CH=N), 7.96 (dd, *J* = 1.3, 7.5 Hz, 2 H, Ar), 7.78 (d, *J* =

8.0 Hz, 2 H, Ar), 7.49-7.40 (m, 3 H, Ar), 7.24 (d,  $J = 8.0$  Hz, 2 H, Ar), 6.97 (brs, 2 H, 2 NH), 2.35 (s, 3 H, CH<sub>3</sub>) ppm. <sup>13</sup>C NMR (100 MHz, DMSO-d<sub>6</sub>):  $\delta = 158.4$  (C=NH), 153.1 (CH=N), 139.3, 133.8, 132.8, 130.1, 129.1, 128.0, 127.6, 126.6 (Ar), 20.98 (CH<sub>3</sub>) ppm. Anal. Calcd. for C<sub>15</sub>H<sub>15</sub>N<sub>3</sub> (237.3): C, 75.92; H, 6.37; N, 17.71. Found: C, 75.80; H, 6.25; N, 17.82.

***N*<sup>l</sup>-(4-Methylthiobenzylidene)-benzamidrazone (35e)**: Prepared from benzamidrazone (**5**, 0.15 g, 1.11 mmol) and 4-methylthiobenzaldehyde (0.16 mL, 1.22 mmol) according to **General procedure VIII** to yield **35e** as a white solid (0.24 g, 80%). m.p. 189-191 °C; <sup>1</sup>H NMR (400 MHz, DMSO-d<sub>6</sub>):  $\delta = 8.39$  (s, 1 H, CH=N), 7.93 (d,  $J = 6.7$  Hz, 2 H, Ar), 7.82 (d,  $J = 7.8$  Hz, 2 H, Ar), 7.51-7.37 (m, 3 H, Ar), 7.27 (d,  $J = 7.8$  Hz, 2 H, Ar), 7.02 (brs, 2 H, 2 NH), 2.50 (s, 3 H, CH<sub>3</sub>) ppm. <sup>13</sup>C NMR (100 MHz, DMSO-d<sub>6</sub>):  $\delta = 158.4$  (C=NH), 152.6 (CH=N), 140.2, 133.8, 132.1, 130.2, 128.1, 126.6, 125.4 (Ar), 14.3 (CH<sub>3</sub>) ppm. Anal. Calcd. for C<sub>15</sub>H<sub>15</sub>N<sub>3</sub>S (269.36): C, 66.88; H, 5.61; N, 15.60. Found: C, 66.81; H, 5.69; N, 15.68.

***N*<sup>l</sup>-(4-Methoxybenzylidene)-benzamidrazone (35f)**: Prepared from ethylbenzimidate (**34**, 0.15 g, 1.01 mmol) and 4-methoxybenzaldehyde hydrazone (0.15 g, 1.01 mmol) according to **General procedure VII** to yield **35f** as a white solid (0.12 g, 47%).

Prepared from benzamidrazone (**5**, 0.30 g, 2.22 mmol) and 4-methoxybenzaldehyde (0.30 mL, 2.44 mmol) according to **General procedure VIII** to yield **35f** as a white solid (0.51 g, 90%). m.p. 143-145 °C; <sup>1</sup>H NMR (400 MHz, DMSO-d<sub>6</sub>):  $\delta = 8.40$  (s, 1 H, CH=N), 8.10-7.70 (m, 4 H, Ar), 7.60-7.30 (m, 3 H, Ar), 7.15-6.73 (m, 4 H, Ar, 2 NH), 3.81 (s, 3 H, CH<sub>3</sub>) ppm. <sup>13</sup>C NMR (100 MHz, DMSO-d<sub>6</sub>):  $\delta = 160.5$ , 158.0 (C=NH, C-OMe), 152.8 (CH=N), 133.9, 130.0, 129.2, 128.2, 128.0, 126.5, 114.0 (Ar), 55.2 (CH<sub>3</sub>) ppm. Anal. Calcd. for C<sub>15</sub>H<sub>15</sub>N<sub>3</sub>O (253.3): C, 71.13; H, 5.97; N, 16.59. Found: C, 71.01; H, 6.09; N, 16.47.

***N*<sup>l</sup>-(4-Nitrobenzylidene)-benzamidrazone (35g)**: Prepared from ethylbenzimidate (**34**, 0.15 g, 1.01 mmol) and 4-nitrobenzaldehyde hydrazone (0.17 g, 1.01 mmol) according to **General procedure VII** to yield **35g** as an orange solid (0.16 g, 59%).

Prepared from benzamidrazone (**5**, 0.15 g, 1.11 mmol) and 4-nitrobenzaldehyde (0.18 g, 1.22 mmol) according to **General procedure VIII** to yield **35g** as an orange solid (0.28 g, 94%).

m.p. 195-198 °C; <sup>1</sup>H NMR (400 MHz, DMSO-d<sub>6</sub>): δ = 8.56 (s, 1 H, CH=N), 8.26 (d, *J* = 8.7 Hz, 2 H, Ar), 8.18 (d, *J* = 8.7 Hz, 2 H, Ar), 7.98 (d, *J* = 7.5 Hz, 2 H, Ar), 7.55-7.42 (m, 3 H, Ar), 7.38 (brs, 2 H, 2 NH) ppm. <sup>13</sup>C NMR (100 MHz, DMSO-d<sub>6</sub>): δ = 160.7 (C=NH), 151.2 (CH=N), 148.0, 142.6, 134.0, 131.1, 128.9, 128.7, 127.4, 124.2 (Ar) ppm. Anal. Calcd. for C<sub>14</sub>H<sub>12</sub>N<sub>4</sub>O<sub>2</sub> (268.27): C, 62.68; H, 4.51; N, 20.88. Found: C, 62.80; H, 4.63; N, 20.99.

***N*<sup>l</sup>-(4-Cyanobenzylidene)-benzamidrazone (35h)**: Prepared from ethylbenzimidate (**34**, 0.15 g, 1.01 mmol) and 4-cyanobenzaldehyde hydrazone (0.15 g, 1.01 mmol) according to **General procedure VII** to yield **35h** as a white solid (0.21 g, 84%).

Prepared from benzamidrazone (**5**, 0.20 g, 1.48 mmol) and 4-cyanobenzaldehyde (0.21g, 1.63 mmol) according to **General procedure VIII** to yield **35h** as a white solid (0.29 g, 78%).

m.p. 190-192 °C; <sup>1</sup>H NMR (400 MHz, DMSO-d<sub>6</sub>): δ = 8.50 (s, 1 H, CH=N), 8.10 (d, *J* = 7.9 Hz, 2 H, Ar), 7.97 (d, *J* = 6.9 Hz, 2 H, Ar), 7.87 (d, *J* = 7.9 Hz, 2 H, Ar), 7.55-7.40 (m, 3 H, Ar), 7.35 (brs, 2 H, 2 NH) ppm. <sup>13</sup>C NMR (100 MHz, DMSO-d<sub>6</sub>): δ = 159.9 (C=NH), 151.2 (CH=N), 140.1, 133.4, 132.4, 130.6, 128.2, 126.9, 118.9 (Ar), 111.2 (CN) ppm. Anal. Calcd. for C<sub>15</sub>H<sub>12</sub>N<sub>4</sub> (248.28): C, 72.56; H, 4.87; N, 22.57. Found: C, 72.49; H, 4.96; N, 22.65.

***N*<sup>l</sup>-(4-Acetamidobenzylidene)-benzamidrazone (35i)**: Prepared from ethylbenzimidate (**34**, 0.15 g, 1.01 mmol) and 4-acetamidobenzaldehyde hydrazone (0.18 g, 1.01 mmol) according to **General procedure VII** to yield **35i** as a white solid (0.21 g, 74%).



Prepared from benzamidrazone (**5**, 0.15 g, 1.11 mmol) and 4-acetamidobenzaldehyde (0.20 g, 1.22 mmol) according to **General procedure VIII** to yield **35i** as a white solid (0.25 g, 82%). m.p. 199-202 °C; <sup>1</sup>H NMR (400 MHz, DMSO-d<sub>6</sub>): δ = 10.11 (s, 1 H, NH), 8.38 (s, 1 H, CH=N), 7.95 (d, *J* = 6.4 Hz, 2 H, Ar), 7.82 (d, *J* = 8.2 Hz, 2 H, Ar), 7.65 (d, *J* = 8.1 Hz, 2 H, Ar), 7.51-7.39 (m, 3 H, Ar), 7.00 (brs, 2 H, 2 NH), 2.07 (s, 3 H, CH<sub>3</sub>) ppm. <sup>13</sup>C NMR (100 MHz, DMSO-d<sub>6</sub>): δ = 168.9 (CO), 158.8 (C=NH), 153.3 (CH=N), 141.1, 134.4, 130.8, 130.6, 128.8, 128.6, 127.1, 119.2 (Ar), 24.6 (CH<sub>3</sub>) ppm. Anal. Calcd. for C<sub>16</sub>H<sub>16</sub>N<sub>4</sub>O (280.32): C, 68.55; H, 5.75; N, 19.99. Found: C, 68.48; H, 5.69; N, 19.91.

***N*'-(4-Hydroxybenzylidene)-benzamidrazone (35j)**: Prepared from benzamidrazone (**5**, 0.20 g, 1.48 mmol) and 4-hydroxybenzaldehyde (0.20 g, 1.63 mmol) according to **General procedure VIII** to yield **35j** (0.33 g, 93%) as a yellow solid. m.p. 179-182 °C; <sup>1</sup>H NMR (400 MHz, DMSO-d<sub>6</sub>): δ = 9.87 (s, 1 H, OH), 8.35 (s, 1 H, CH=N), 7.93 (d, *J* = 6.4 Hz, 2 H, Ar), 7.72 (d, *J* = 8.3 Hz, 2 H, Ar), 7.51-7.35 (m, 3 H, Ar), 6.89 (brs, 2 H, 2 NH), 6.82 (d, *J* = 8.3 Hz, 2 H, Ar) ppm. <sup>13</sup>C NMR (100 MHz, DMSO-d<sub>6</sub>): δ = 159.6, 158.2 (C=NH, C-OH), 153.8 (CH=N), 134.5, 130.5, 129.9, 128.6, 127.2, 127.0, 115.9 (Ar) ppm. Anal. Calcd. for C<sub>14</sub>H<sub>13</sub>N<sub>3</sub>O (239.27): C, 70.28; H, 5.48; N, 17.56. Found: C, 70.40; H, 5.56; N, 17.49.

***N*'-[(Pyridin-4-yl)methylidene]-benzamidrazone (35k)**: Prepared from benzamidrazone (**5**, 0.10 g, 0.74 mmol) and 4-pyridinecarboxaldehyde (0.077 mL, 0.81 mmol) according to **General procedure VIII** to yield **35k** as a yellow solid (0.13 g, 77%). m.p. 169-172 °C; <sup>1</sup>H NMR (400 MHz, DMSO-d<sub>6</sub>): δ = 8.62 (s, 2 H, Ar), 8.43 (s, 1 H, CH=N), 7.97 (d, *J* = 7.0 Hz, 2 H, Ar), 7.90-7.81 (m, 2 H, Ar), 7.56-7.39 (m, 3 H, Ar), 7.32 (brs, 2 H, 2 NH). <sup>13</sup>C NMR (100 MHz, DMSO-d<sub>6</sub>): δ = 160.6 (C=NH), 151.2 (CH=N), 150.4, 143.1, 134.0, 131.1, 128.7,

127.4, 122.0 (Ar) ppm. Anal. Calcd. for C<sub>13</sub>H<sub>12</sub>N<sub>4</sub> (224.26): C, 69.62; H, 5.39; N, 24.98.

Found: C, 69.74; H, 5.28; N, 25.09.

***N*<sup>1</sup>-(4-Fluorobenzylidene)-pyridine-2-carboxamidrazone (36a)**: Prepared from pyridinecarboximidic acid hydrazide (**6**, 0.13 g, 0.92 mmol) and 4-fluorobenzaldehyde (0.11 mL, 1.01 mmol) according to **General procedure VIII** to yield **36a** as a white solid (0.20 g, 75%). m.p. 115-117 °C; <sup>1</sup>H NMR (400 MHz, DMSO-d<sub>6</sub>): δ = 8.65 (d, *J* = 3.9 Hz, 1 H, Ar), 8.49 (s, 1 H, CH=N), 8.23 (d, *J* = 7.8 Hz, 1 H, Ar), 8.04-7.88 (m, 3 H, Ar), 7.57-7.48 (m, 1 H, Ar), 7.33-7.23 (m, 2 H, Ar), 7.11 (brs, 2 H, 2 NH) ppm. <sup>13</sup>C NMR (100 MHz, DMSO-d<sub>6</sub>): δ = 163.0 (d, *J* = 247.9 Hz, Ar), 156.5 (C=NH), 152.8 (CH=N), 150.2, 148.4, 136.9, 131.9, 129.9 (d, *J* = 8.2 Hz), 125.3, 121.0, 119.4, 115.6, 115.5 (d, *J* = 21.7 Hz) (Ar) ppm. Anal. Calcd. for C<sub>13</sub>H<sub>11</sub>N<sub>4</sub>F (242.25): C, 64.45; H, 4.58; N, 23.13. Found: C, 64.38; H, 4.51; N, 23.23.

***N*<sup>1</sup>-(3-Chlorobenzylidene)-pyridine-2-carboxamidrazone (36b)**: Prepared from pyridinecarboximidic acid hydrazide (**6**, 0.15 g, 1.10 mmol) and 3-chlorobenzaldehyde (0.14 mL, 1.21 mmol) according to **General procedure VIII** to yield **36b** as a white solid (0.19 g, 61%). m.p. 70-72 °C; <sup>1</sup>H NMR (400 MHz, DMSO-d<sub>6</sub>): δ = 8.67 (d, *J* = 4.4 Hz, 1 H, Ar), 8.48 (s, 1 H, CH=N), 8.24 (d, *J* = 7.9 Hz, 1 H, Ar), 8.12 (s, 1 H, Ar), 7.97-7.88 (m, 1 H, Ar), 7.87-7.78 (m, 1 H, Ar), 7.58-7.50 (m, 1 H, Ar), 7.49-7.50 (m, 2 H, Ar), 7.38, 7.15 (2 brs, 2 H, 2 NH) ppm. <sup>13</sup>C NMR (100 MHz, DMSO-d<sub>6</sub>): δ = 157.0 (C=NH), 152.4 (CH=N), 150.1, 148.5, 137.6, 136.9, 133.5, 130.3, 129.3, 126.8, 126.7, 125.4, 121.1 (Ar) ppm. Anal. Calcd. for C<sub>13</sub>H<sub>11</sub>N<sub>4</sub>Cl (258.71): C, 60.35; H, 4.29; N, 21.66. Found: C, 60.46; H, 4.38; N, 21.74.

***N*<sup>1</sup>-(4-Bromobenzylidene)-pyridine-2-carboxamidrazone (36c)**: Prepared from pyridinecarboximidic acid hydrazide (**6**, 0.15 g, 1.10 mmol) and 4-bromobenzaldehyde (0.22

g, 1.21 mmol) according to **General procedure VIII** to yield **36c** as a white solid (0.30 g, 85%). m.p. 145-148 °C; <sup>1</sup>H NMR (400 MHz, DMSO-d<sub>6</sub>): δ = 8.66 (bs, 1 H, Ar), 8.47 (s, 1 H, CH=N), 8.23 (d, *J* = 6.6 Hz, 1 H, Ar), 7.97-7.83 (m, 3 H, Ar), 7.64 (d, *J* = 6.5 Hz, 2 H, Ar), 7.56-7.47 (m, 1 H, Ar), 7.16 (brs, 2 H, 2 NH) ppm. <sup>13</sup>C NMR (100 MHz, DMSO-d<sub>6</sub>): δ = 156.7 (C=NH), 152.8 (CH=N), 150.1, 148.4, 136.9, 134.6, 131.4, 129.6, 125.3, 123.0, 121.0 (Ar) ppm. Anal. Calcd. for C<sub>13</sub>H<sub>11</sub>N<sub>4</sub>Br (303.16): C, 51.50; H, 3.66; N, 18.48. Found: C, 51.59; H, 3.72; N, 18.56.

***N*<sup>l</sup>-(4-Methylbenzylidene)-pyridine-2-carboxamidrazone (36d)**: Prepared from pyridinecarboximidic acid hydrazide (**6**, 0.30 g, 2.22 mmol) and 4-methylbenzaldehyde (0.29 mL, 2.43 mmol) according to **General procedure VIII** to yield **36d** as a white solid (0.39 g, 74%). m.p. 119-121 °C; <sup>1</sup>H NMR (400 MHz, DMSO-d<sub>6</sub>): δ = 8.66 (bs, 1 H, Ar), 8.47 (s, 1 H, CH=N), 8.24 (d, *J* = 6.6 Hz, 1 H, Ar), 8.00-7.65 (m, 3 H, Ar), 7.60-7.40 (m, 1 H, Ar), 7.38-7.19 (m, 2 H, Ar), 7.05 (brs, 2 H, 2 NH), 2.34 (s, 3 H, CH<sub>3</sub>) ppm. <sup>13</sup>C NMR (100 MHz, DMSO-d<sub>6</sub>): δ = 156.2 (C=NH), 154.1 (CH=N), 150.3, 148.4, 139.6, 136.8, 132.6, 129.1, 127.8, 125.3, 121.0 (Ar), 21.0 (CH<sub>3</sub>) ppm. Anal. Calcd. for C<sub>14</sub>H<sub>14</sub>N<sub>4</sub> (238.29): C, 70.57; H, 5.92; N, 23.51. Found: C, 70.65; H, 5.83; N, 23.59.

***N*<sup>l</sup>-(4-(Methylthio)benzylidene)-pyridine-2-carboxamidrazone (36e)**: Prepared from pyridinecarboximidic acid hydrazide (**6**, 0.18 g, 1.32 mmol) and 4-methylthiobenzaldehyde (0.19 mL, 1.46 mmol) according to **General procedure VIII** to yield **5i** as a yellow solid (0.29 g, 82%). m.p. 151-153 °C; <sup>1</sup>H NMR (400 MHz, DMSO-d<sub>6</sub>): δ = 8.67 (d, *J* = 4.0 Hz, 1 H, Ar), 8.45 (s, 1 H, CH=N), 8.22 (d, *J* = 7.4 Hz, 1 H, Ar), 7.96-7.90 (m, 1 H, Ar), 7.87 (d, *J* = 8.3 Hz, 2 H, Ar), 7.60-7.48 (m, 1 H, Ar), 7.30 (d, *J* = 8.3 Hz, 2 H, Ar), 7.06 (brs, 2 H, 2 NH), 2.52 (s, 3 H, SCH<sub>3</sub>) ppm. <sup>13</sup>C NMR (100 MHz, DMSO-d<sub>6</sub>): δ = 156.25 (C=NH), 153.7

(CH=N), 150.3, 148.4, 140.6, 136.9, 131.8, 128.2, 125.4, 125.3, 121.0 (Ar), 14.2 (SCH<sub>3</sub>) ppm.  
Anal. Calcd. for C<sub>14</sub>H<sub>14</sub>N<sub>4</sub>S (270.35): C, 62.20; H, 5.22; N, 20.72. Found: C, 62.28; H, 5.31;  
N, 20.83.

***N*<sup>1</sup>-(4-Methoxybenzylidene)-pyridine-2-carboxamidrazone (36f)**: Prepared from pyridinecarboximidic acid hydrazide (**6**, 0.15 g, 1.10 mmol) and 4-methoxybenzaldehyde (0.15 mL, 1.21 mmol) and according to **General procedure VIII** to yield **36f** as a white solid (0.22 g, 79%). m.p. 112-113 °C; <sup>1</sup>H NMR (400 MHz, DMSO-d<sub>6</sub>): δ = 8.66 (d, *J* = 4.5 Hz, 1 H, Ar), 8.44 (s, 1 H, CH=N), 8.23 (d, *J* = 7.9 Hz, 1 H, Ar), 7.96-7.83 (m, 3 H, Ar), 7.56-7.48 (m, 1 H, Ar), 7.09-6.95 (m, 4 H, Ar, 2 NH), 3.81 (s, 3 H, CH<sub>3</sub>) ppm. <sup>13</sup>C NMR (100 MHz, DMSO-d<sub>6</sub>): δ = 160.5, 155.7 (C-OMe, C=NH), 153.6 (CH=N), 150.1, 148.2, 136.6, 129.2, 127.7, 125.0, 120.6, 113.8 (Ar), 55.0 (CH<sub>3</sub>) ppm. Anal. Calcd. for C<sub>14</sub>H<sub>14</sub>N<sub>4</sub>O (254.29): C, 66.13; H, 5.55; N, 22.03. Found: C, 66.21; H, 5.62; N, 22.13.

***N*<sup>1</sup>-(4-Nitrobenzylidene)-pyridine-2-carboxamidrazone (36g)**: Prepared from pyridinecarboximidic acid hydrazide (**6**, 0.15 g, 1.10 mmol) and 4-nitrobenzaldehyde (0.18 g, 1.21 mmol) according to **General procedure VIII** to yield **36g** as an orange solid (0.26 g, 87%). m.p. 218-220 °C; <sup>1</sup>H NMR (400 MHz, DMSO-d<sub>6</sub>): δ = 8.67 (d, *J* = 4.3 Hz, 1 H, Ar), 8.60 (s, 1 H, CH=N), 8.32-8.18 (m, 5 H, Ar), 8.01-7.90 (m, 1 H, Ar), 7.60-7.53 (m, 1 H, Ar), 7.50, 7.33 (2 brs, 2 H, 2 NH) ppm. <sup>13</sup>C NMR (100 MHz, DMSO-d<sub>6</sub>): δ = 157.8 (C=NH), 151.7 (CH=N), 150.0, 148.6, 147.6, 141.7, 137.1, 128.6, 125.7, 123.7, 121.4 (Ar) ppm. Anal. Calcd. for C<sub>13</sub>H<sub>11</sub>N<sub>5</sub>O<sub>2</sub> (269.26): C, 57.99; H, 4.12; N, 26.01. Found: C, 58.09; H, 4.19; N, 26.11.

***N*<sup>l</sup>-(4-Cyanobenzylidene)-pyridine-2-carboxamidrazone (36h):** Prepared from pyridinecarboximidic acid, hydrazide (**6**, 0.23 g, 1.69 mmol) and 4-cyanobenzaldehyde (0.24 g, 1.86 mmol) according to **General procedure VIII** to yield **36h** as a white solid (0.34 g, 81%). m.p. 192-194 °C; <sup>1</sup>H NMR (400 MHz, DMSO-d<sub>6</sub>): δ 8.67 (brs, 1 H, Ar), 8.55 (s, 1 H, CH=N), 8.24 (d, *J* = 7.6 Hz, 1 H, Ar), 8.13 (d, *J* = 7.4 Hz, 2 H, Ar), 7.98-7.75 (m, 3 H, Ar), 7.60-7.50 (m, 1 H, Ar), 7.43, 7.27 (2 brs, 2 H, 2 NH) ppm. <sup>13</sup>C NMR (100 MHz, DMSO-d<sub>6</sub>): δ = 157.5 (C=NH), 152.2 (CH=N), 150.0, 148.5, 139.8, 137.0, 132.3, 128.2, 125.5, 121.3, 118.8 (Ar), 111.5 (CN) ppm. Anal. Calcd. for C<sub>14</sub>H<sub>11</sub>N<sub>5</sub> (249.27): C, 67.46; H, 4.45; N, 28.10. Found: C, 67.37; H, 4.52; N, 28.18.

***N*<sup>l</sup>-(4-Acetamidobenzylidene)-pyridine-2-carboxamidrazone (36i):** Prepared from pyridinecarboximidic acid hydrazide (**6**, 0.30 g, 2.21 mmol) and 4-acetamidobenzaldehyde (0.40 g, 2.43 mmol) according to **General procedure VIII** to yield **36i** as a white solid (0.62 g, 95%). m.p. 193-195 °C; <sup>1</sup>H NMR (400 MHz, DMSO-d<sub>6</sub>): δ = 10.12 (s, 1 H, NH), 8.65 (d, *J* = 4.4 Hz, 1 H, Ar), 8.42 (s, 1 H, CH=N), 8.22 (d, *J* = 7.9 Hz, 1 H, Ar), 7.95-7.87 (m, 1 H, Ar), 7.84 (d, *J* = 8.5 Hz, 2 H, Ar), 7.65 (d, *J* = 8.5 Hz, 2 H, Ar), 7.55-7.47 (m, 1 H, Ar), 7.01 (brs, 2 H, 2 NH), 2.07 (s, 3 H, CH<sub>3</sub>) ppm. <sup>13</sup>C NMR (100 MHz, DMSO-d<sub>6</sub>): δ = 168.4 (CO), 156.1 (C=NH), 153.7 (CH=N), 150.3, 148.4, 140.8, 136.8, 130.0, 128.4, 125.2, 120.9, 118.6 (Ar), 24.1 (CH<sub>3</sub>). Anal. Calcd. for C<sub>15</sub>H<sub>15</sub>N<sub>5</sub>O (281.31): C, 64.04; H, 5.37; N, 24.90. Found: C, 64.11; H, 5.31; N, 24.98.

***N*<sup>l</sup>-[(Pyridin-4-yl)methylidene]-pyridine-2-carboxamidrazone (36j):** Prepared from pyridinecarboximidic acid hydrazide (**6**, 0.10 g, 0.74 mmol) and 4-pyridinecarboxaldehyde (0.077 mL, 0.81 mmol) according to **General procedure VIII** to yield **36j** as a yellow solid

(0.26 g, 81%). m.p. 152-155 °C (lit.<sup>7</sup> m.p. 151 °C); NMR data correspond to the literature values.<sup>7</sup>

***N*<sup>1</sup>-(4-Hydroxybenzylidene)-pyridine-2-carboxamidrazone (36k)**: Prepared from pyridinecarboximidic acid hydrazide (**6**, 0.18 g, 1.32 mmol) and 4-hydroxybenzaldehyde (0.18 g, 1.46 mmol) according to **General procedure VIII** to yield **36k** as a yellow solid (0.27 g, 79%). m.p. 195-197 °C; <sup>1</sup>H NMR (400 MHz, DMSO-d<sub>6</sub>): δ = 9.92 (s, 1 H, OH), 8.64 (d, *J* = 4.7 Hz, 1 H, Ar), 8.39 (s, 1 H, CH=N), 8.27-8.17 (m, 1 H, Ar), 7.96-7.86 (m, 1 H, Ar), 7.74 (d, *J* = 8.5 Hz, 2 H, Ar), 7.57-7.47 (m, 1 H, Ar), 6.88 (brs, 2 H, 2 NH), 6.83 (d, *J* = 8.5 Hz, 2 H, Ar) ppm. <sup>13</sup>C NMR (100 MHz, DMSO-d<sub>6</sub>): δ = 159.3, 155.7 (C=NH, C-OH), 154.3 (CH=N), 150.4, 148.4, 136.8, 129.6, 126.4, 125.1, 120.8, 115.4 (Ar) ppm. Anal. Calcd. for C<sub>13</sub>H<sub>12</sub>N<sub>4</sub>O (240.26): C, 64.99; H, 5.03; N, 23.32. Found: C, 64.90; H, 5.11; N, 23.41.

**General procedure IX for the synthesis of asymmetric 3,5-disubstituted-1,2,4-triazoles (39, 40)**

An arylidene amidazone (**35** or **36**, 0.331 mmol) was dissolved in CH<sub>2</sub>Cl<sub>2</sub> (10 mL), and NBS (0.059 g, 0.331 mmol) was added. The reaction mixture was stirred at room temperature. When the reaction was complete (TLC, EtOAc/hexane = 1:3) the solvent was evaporated under reduced pressure. The crude product was dissolved in glacial acetic acid (8 mL), then ammonium acetate (0.028 g, 0.364 mmol) was added. The reaction mixture was stirred and heated at 110 °C overnight. When the reaction was complete (TLC, EtOAc/toluene = 1:3) the mixture was diluted with H<sub>2</sub>O (30 mL), and washed with EtOAc (4 x 15 mL). The organic layer was separated, and washed with water (15 mL), dried (MgSO<sub>4</sub>), and evaporated under reduced pressure. The residue was purified by column chromatography (EtOAc/hexane = 1:2).

**General procedure X for the synthesis of asymmetric 3,5-disubstituted-1,2,4-triazoles(39, 40)**

An arylidene amidazone (**35** or **36**, 0.83 mmol) and ammonium acetate (0.13 g, 0.1.66 mmol) was dissolved in glacial AcOH (16 mL), then NBS (0.148 g, 0.83 mmol) was added. The mixture was stirred and heated at 110 °C overnight. When the reaction was complete (TLC, EtOAc/toluene = 1:3) the mixture was diluted with H<sub>2</sub>O (30 mL), and washed with EtOAc (4 x 15 mL). The organic layer was separated, and washed with water (15 mL), dried (MgSO<sub>4</sub>), and evaporated under reduced pressure. The residue was purified by column chromatography (EtOAc/hexane = 1:2).

**3-(4-Fluorophenyl)-5-phenyl-1,2,4-triazole (39a) and 4-(4-fluorobenzylidene-amino)-3-(4-fluorophenyl)-5-phenyl-1,2,4-triazole (41a):** Prepared from **35a** (0.10 g, 0.41 mmol) according to **General procedure IX**. Purified by column chromatography (EtOAc/hexane = 1:2) to yield **39a** as a white solid (0.022 g, 22%) and **41a** as a white amorphous solid (0.021 g, 14%).

Prepared from **35a** (0.20 g, 0.83 mmol) according to **General procedure X** to yield **39a** as a white solid (0.135 g, 68%).

**39a:** m.p. 220-222 °C (lit.<sup>8</sup> m.p. 208-211 °C); <sup>1</sup>H NMR (400 MHz, DMSO-d<sub>6</sub>): δ = 14.55 (brs, 1 H, NH), 8.35-7.92 (m, 4 H, Ar), 7.70-7.06 (m, 5 H, Ar) ppm. <sup>13</sup>C NMR (100 MHz, DMSO-d<sub>6</sub>): δ = 163.1 (d, *J* = 246.7 Hz, Ar), 160.6, 155.0 (C-3-, C-5-triazole), 129.7, 128.9, 128.2, 126.0, 115.8 (d, *J* = 21.6 Hz) (Ar) ppm. ESI-MS (positive mode) m/z calcd. for C<sub>14</sub>H<sub>10</sub>N<sub>3</sub>F (239.25), Found: 239.1 [M]<sup>+</sup>.

**41a:** R<sub>f</sub>: 0.2 (EtOAc/hexane = 1:2); <sup>1</sup>H NMR (400 MHz, DMSO-d<sub>6</sub>): δ = 8.56 (s, 1 H, CH=N), 8.21-7.91 (m, 3 H, Ar), 7.90-7.71 (m, 3 H, Ar), 7.58-7.31 (m, 4 H, Ar), 7.21-6.96 (m, 3 H, Ar) ppm. <sup>13</sup>C NMR (100 MHz, DMSO-d<sub>6</sub>) δ = 165.4 (d, *J* = 251.4 Hz, Ar), 165.0 (d, *J* = 246.5 Hz, Ar), 159.7 (C-3-, C-5-triazol), 154.7 (CH=N), 133.7-126.4 (Ar), 115.7 (d, *J* = 21.9 Hz) (Ar) ppm. ESI-MS (positive mode) m/z calcd. for C<sub>21</sub>H<sub>14</sub>N<sub>4</sub>F<sub>2</sub> (360.36), Found: 360.1 [M]<sup>+</sup>.

**3-(3-Chlorophenyl)-5-phenyl-1,2,4-triazole (39b):** Prepared from **35b** (0.10 g, 0.39 mmol) according to **General procedure IX** to yield **39b** as a white solid (0.034 g, 34%).

Prepared from **35b** (0.20 g, 0.78 mmol) according to **General procedure X** to yield **39b** as a white solid (128 mg, 64%). m.p. 219-220 °C; <sup>1</sup>H NMR (400 MHz, DMSO-d<sub>6</sub>): δ = 14.58 (s, 1 H, NH), 8.13-7.90 (m, 4 H, Ar), 7.54-7.35 (m, 5 H, Ar) ppm. <sup>13</sup>C NMR (100 MHz, DMSO-



d6):  $\delta$  = 160.1, 155.4 (C-3-, C-5-triazole), 133.6, 130.8, 129.8, 128.9, 126.0, 125.5, 124.4 (Ar) ppm. ESI-MS (positive mode) m/z calcd. for  $C_{14}H_{10}N_3Cl$  (255.70), Found: 255.1  $[M]^+$ .

**3-(4-Bromophenyl)-5-phenyl-1,2,4-triazole (39c):** Prepared from **35c** (0.10 g, 0.33 mmol) according to **General procedure IX** to yield **39c** as a white solid (22 mg, 22%).

Prepared from **35c** (0.10 g, 0.33 mmol) according to **General procedure X** to yield **39c** as a white solid (0.06 g, 60%). m.p. 255-257 °C (lit.<sup>9</sup> m.p. 249-251 °C);  $^1H$  NMR (400 MHz, DMSO-d6):  $\delta$  = 14.60 (s, 1 H, NH), 8.25-7.98 (m, 4 H, Ar), 7.81-7.68 (m, 2 H, Ar), 7.57-7.48 (m, 3 H, Ar) ppm.  $^{13}C$  NMR (100 MHz, DMSO-d6):  $\delta$  = 161.8, 156.0 (C-3-, C-5-triazole), 132.9, 130.9, 130.0, 129.0, 127.1, 123.7 (Ar) ppm. ESI-MS (positive mode) m/z calcd. for  $C_{14}H_{10}N_3Br$  (300.15), Found: 300.0  $[M]^+$ .

**3-(4-Methylphenyl)-5-phenyl-1,2,4-triazole (39d) and 4-(4-methylbenzylidene-amino)-3-(4-methylphenyl)-5-phenyl-1,2,4-triazole (41d):** Prepared from **35d** (0.10 g, 0.42 mmol) according to **General procedure IX**. Purified by column chromatography (EtOAc/hexane = 1:2) to yield **39d** as a white solid (17 mg, 17%) and **41d** as a white amorphous solid (0.056 g, 38%).

Prepared from **35d** (0.05 g, 0.21 mmol) according to **General procedure X** to yield **39d** as a white solid (25 mg, 50%).

**39d:** m.p. 178-181 °C (lit.<sup>10</sup> m.p. 180-183 °C);  $^1H$  NMR (400 MHz,  $CDCl_3$ ):  $\delta$  = 14.49 (s, 1 H, NH), 7.94 (d,  $J$  = 8.0 Hz, 2 H, Ar), 7.82 (d,  $J$  = 8.1 Hz, 2 H, Ar), 7.35-7.25 (m, 3 H, Ar), 7.08 (d,  $J$  = 8.3 Hz, 2 H, Ar), 2.31 (3H, s,  $CH_3$ ) ppm.  $^{13}C$  NMR (100 MHz, DMSO-d6):  $\delta$  = 162.0, 155.6 (C-3-, C-5-triazole), 140.4, 138.7, 131.9, 129.9, 129.3, 129.2, 126.5, 125.1 (Ar), 21.4 ( $CH_3$ ) ppm. ESI-MS (positive mode) m/z calcd. for  $C_{15}H_{13}N_3$  (235.28), Found: 235.1  $[M]^+$ .

**41d:** R<sub>f</sub>: 0.2 (EtOAc/hexane = 1:2); m.p. 175-178 °C (lit.<sup>11</sup> m.p. 178-179 °C); <sup>1</sup>H NMR (400 MHz, DMSO-d<sub>6</sub>) δ (ppm) 8.57 (s, 1 H, CH=N), 7.84 (d, *J* = 7.4 Hz, 2 H, Ar), 7.71-7.67 (m, 4 H, Ar), 7.54-7.43 (m, 3 H, Ar), 7.38-7.26 (m, 4 H, Ar), 2.36, 2.32 (2 s, 6 H, CH<sub>3</sub>). <sup>13</sup>C NMR (100 MHz, DMSO-d<sub>6</sub>): δ (ppm) = 171.0 (CH=N), 150.1, 150.0 (C-3-, C-5-triazole), 144.0, 139.4 (C-OMe), 129.8-123.5 (Ar), 21.2, 21.0 (CH<sub>3</sub>). ESI-MS (positive mode) m/z calcd. for C<sub>23</sub>H<sub>20</sub>N<sub>4</sub> (352.43), Found: 352.2 [M]<sup>+</sup>.

**3-(4-Methylthiophenyl)-5-phenyl-1,2,4-triazole (39e):** Prepared from **35e** (0.10 g, 0.37 mmol) according to **General procedure IX** to yield **39e** as a white solid (0.03 g, 30%). Prepared from **35e** (0.10 g, 0.37 mmol) according to **General procedure X** to yield **39e** as a white solid (0.06 g, 61%). m.p. 173-175 °C; <sup>1</sup>H NMR (400 MHz, DMSO-d<sub>6</sub>): δ = 14.42 (s, 1 H, NH), 8.08 (d, *J* = 7.4 Hz, 2 H, Ar), 8.01 (d, *J* = 8.2 Hz, 2 H, Ar), 7.57-7.45 (m, 3 H, Ar), 7.41 (d, *J* = 8.2 Hz, 2 H, Ar), 2.53 (s, 3 H, CH<sub>3</sub>) ppm. <sup>13</sup>C NMR (100 MHz, DMSO-d<sub>6</sub>): δ = 158.3, 157.9 (C-3-, C-5-triazole), 140.2, 129.5, 128.8, 126.3, 125.9, 125.7 (Ar), 14.3 (CH<sub>3</sub>) ppm. ESI-MS (positive mode) m/z calcd. for C<sub>15</sub>H<sub>13</sub>N<sub>3</sub>S (267.35), Found: 267.1 [M]<sup>+</sup>.

**3-(4-Methoxyphenyl)-5-phenyl-1,2,4-triazole (39f):** Prepared from **35f** (0.10 g, 0.40 mmol) according to **General procedure X** to yield **39f** as a white solid (0.06 g, 60%). m.p. 158-160 °C (lit.<sup>12</sup> m.p. 154-156 °C); <sup>1</sup>H NMR (400 MHz, CDCl<sub>3</sub>): δ = 10.70 (s, 1 H, NH), 8.00-7.91 (m, 2 H, Ar), 7.94 (d, *J* = 8.8 Hz, 2 H, Ar), 7.38-7.22 (m, 3 H, Ar), 6.79 (d, *J* = 8.8 Hz, 2 H, Ar), 3.77 (s, 3 H, CH<sub>3</sub>) ppm. <sup>13</sup>C NMR (100 MHz, CDCl<sub>3</sub>): δ = 161.0, 160.0, 158.8 (C-OMe, C-3-, C-5-triazole), 129.7, 129.0, 128.7, 128.0, 126.5, 120.8, 114.1 (Ar), 55.2 (CH<sub>3</sub>) ppm. ESI-MS (positive mode) m/z calcd. for C<sub>15</sub>H<sub>13</sub>N<sub>3</sub>O (251.28), Found: 251.1 [M]<sup>+</sup>.

**3-(4-Nitrophenyl)-5-phenyl-1,2,4-triazole (39g):** Prepared from **35g** (0.15 g, 0.56 mmol) according to **General procedure X** to yield **39g** as a white solid (0.05 g, 34%). m.p. 226-228 °C (lit.<sup>13</sup> m.p. 231-234 °C); <sup>1</sup>H NMR (400 MHz, DMSO-d<sub>6</sub>):  $\delta$  = 14.75 (brs, 1 H, NH), 8.40-8.26 (m, 4 H, Ar), 8.08 (d,  $J$  = 7.0 Hz, 2 H, Ar), 7.61-7.45 (m, 3 H, Ar) ppm. <sup>13</sup>C NMR (100 MHz, DMSO-d<sub>6</sub>):  $\delta$  = 158.4, 157.0 (C-3-, C-5-triazole), 147.6, 136.2, 130.2, 129.0, 127.6, 126.8, 126.1, 124.1 (Ar) ppm.

**3-(4-Cyanophenyl)-5-phenyl-1,2,4-triazole (39h):** Prepared from **35h** (0.20 g, 0.81 mmol) according to **General procedure X** to yield **39h** as a white solid (0.070 g, 35%). m.p. 237-239 °C; <sup>1</sup>H NMR (400 MHz, DMSO-d<sub>6</sub>):  $\delta$  = 14.78 (s, 1 H, NH), 8.24 (d,  $J$  = 8.1 Hz, 2 H, Ar), 8.14-7.86 (m, 4 H, Ar), 7.64-7.40 (m, 3 H, Ar) ppm. <sup>13</sup>C NMR (100 MHz, DMSO-d<sub>6</sub>):  $\delta$  = 160.1, 155.5 (C-3-, C-5-triazole), 135.4, 132.8, 130.4, 129.0, 126.4, 126.1, 118.6 (Ar), 111.3 (CN) ppm. Anal. Calcd. for C<sub>15</sub>H<sub>10</sub>N<sub>4</sub> (246.27): C, 73.16; H, 4.09; N, 22.75. Found: C, 73.25; H, 4.22; N, 22.86.

**3-(4-Acetamidophenyl)-5-phenyl-1,2,4-triazole (39i):** Prepared from **35i** (0.10 g, 0.34 mmol) according to **General procedure X** to yield **39i** as a white solid (0.056 g, 56%). m.p. 264-266 °C; <sup>1</sup>H NMR (400 MHz, DMSO-d<sub>6</sub>):  $\delta$  = 10.33 (s, 1 H, NH), 8.25-7.99 (m, 2 H, Ar), 8.04 (d,  $J$  = 7.5 Hz, 2 H, Ar), 7.80 (d,  $J$  = 7.3 Hz, 2 H, Ar), 7.64-7.10 (m, 4 H, Ar, NH), 2.09 (s, 3 H, CH<sub>3</sub>) ppm. <sup>13</sup>C NMR (100 MHz, DMSO-d<sub>6</sub>):  $\delta$  = 168.7 (CO), 156.8, 156.1 (C-3-, C-5-triazole), 141.4, 130.3, 129.0, 127.4, 127.2, 126.4, 121.2, 119.0 (Ar), 24.1 (CH<sub>3</sub>) ppm. Anal. Calcd. for C<sub>16</sub>H<sub>14</sub>N<sub>4</sub>O (278.31): C, 69.05; H, 5.07; N, 20.13. Found: C, 69.15; H, 5.14; N, 20.22.

**3-(4-Pyridyl)-5-phenyl-1,2,4-triazole (39j):** Prepared from **35j** (0.20 g, 0.89 mmol) according to **General procedure X** to yield **39j** as a white solid (0.08 g, 40%). m.p. 242-244 °C (lit.<sup>14</sup> m.p. 244 °C); <sup>1</sup>H NMR (400 MHz, DMSO-d<sub>6</sub>): δ = 14.85 (s, 1 H, NH), 8.81-8.63 (m, 2 H, Ar), 8.08 (d, *J* = 7.0 Hz, 2 H, Ar), 8.00 (d, *J* = 4.2 Hz, 2 H, Ar), 7.60-7.48 (m, 3 H, Ar) ppm. <sup>13</sup>C NMR (100 MHz, DMSO-d<sub>6</sub>) δ (ppm): 160.0, 156.1 (C-3-, C-5-triazole), 150.8, 138.7, 130.9, 129.5, 126.7, 120.6 (Ar) ppm. ESI-MS (positive mode) m/z calcd. for C<sub>13</sub>H<sub>10</sub>N<sub>4</sub> (222.25), Found: 222.1 [M]<sup>+</sup>.

**3-(4-Fluorophenyl)-5-(2-pyridyl)-1,2,4-triazole (40a):** Prepared from **36a** (0.12 g, 0.50 mmol) according to **General procedure X** to yield **40a** as a white solid (0.07 g, 59%). m.p. 239-241 °C (lit.<sup>14</sup> m.p. 241-243 °C); <sup>1</sup>H NMR (400 MHz, DMSO-d<sub>6</sub>): δ = 14.83 (s, 1 H, NH), 8.72 (s, 1 H, Ar), 8.34-7.87 (m, 4 H, Ar), 7.68-7.20 (m, 3 H, Ar) ppm. <sup>13</sup>C NMR (100 MHz, DMSO-d<sub>6</sub>): δ = 162.7 (d, *J* = 245.9 Hz, Ar), 160.6, 154.8 (C-3-, C-5-triazole), 149.5, 146.3, 137.6, 128.0 (d, *J* = 7.6 Hz), 127.2, 124.9, 121.3, 115.7 (d, *J* = 21.7 Hz, Ar) ppm.

**3-(3-Chlorophenyl)-5-(2-pyridyl)-1,2,4-triazole (40b):** Prepared from **36b** (0.13 g, 0.50 mmol) according to **General procedure X** to yield **40b** as a white solid (0.058 g, 45%). m.p. 214-216 °C; <sup>1</sup>H NMR (400 MHz, DMSO-d<sub>6</sub>): δ = 14.97 (s, 1 H, NH), 8.73 (s, 1 H, Ar), 8.26-7.95 (m, 4 H, Ar), 7.62-7.46 (m, 3 H, Ar) ppm. <sup>13</sup>C NMR (100 MHz, DMSO-d<sub>6</sub>): δ = 160.3, 154.8 (C-3-, C-5-triazole), 149.5, 145.9, 137.8, 133.5, 133.1, 130.7, 128.8, 125.3, 125.2, 124.3, 121.4 (Ar) ppm. Anal. Calcd. for C<sub>13</sub>H<sub>9</sub>N<sub>4</sub>Cl (256.69): C, 60.83; H, 3.53; N, 21.83. Found: C, 60.91; H, 3.63; N, 21.91.

**3-(4-Bromophenyl)-5-(2-pyridyl)-1,2,4-triazole (40c):** Prepared from **36c** (0.20 g, 0.66 mmol) according to **General procedure X** to yield **40c** as a white solid (0.08 g, 40%). m.p.

279-281 °C (lit.<sup>15</sup> m.p. 230-231 °C); <sup>1</sup>H NMR (400 MHz, DMSO-d<sub>6</sub>): δ = 14.92 (s, 1 H, NH), 8.72 (s, 1 H, Ar), 8.23-7.95 (m, 4 H, Ar), 7.75-7.62 (m, 2 H, Ar), 7.61-7.47 (m, 1 H, Ar) ppm. <sup>13</sup>C NMR (100 MHz, DMSO-d<sub>6</sub>): δ = 160.7, 154.7 (C-3-, C-5-triazole), 149.5, 146.0, 137.8, 131.7, 130.3, 127.7, 125.1, 122.3, 121.3 (Ar) ppm.

**3-(4-Methylphenyl)-5-(2-pyridyl)-1,2,4-triazole (40d):** Prepared from **36d** (0.20 g, 0.84 mmol) according to **General procedure X** to yield **40d** as a white solid (0.115 g, 50%). m.p. 202-205 °C (lit.<sup>14</sup> m.p. 203-204 °C); <sup>1</sup>H NMR (400 MHz, CDCl<sub>3</sub>): δ = 14.75 (s, 1 H, NH), 8.71 (s, 1 H, Ar), 8.16 (d, 1 H, *J* = 6.5 Hz, Ar), 8.07-7.90 (m, 3 H, Ar), 7.60-7.45 (m, 1 H, Ar), 7.40-7.21 (m, 2 H, Ar), 2.35 (s, 3 H, CH<sub>3</sub>) ppm. <sup>13</sup>C NMR (100 MHz, DMSO-d<sub>6</sub>): δ = 161.7, 154.4 (C-3, C-5-triazole), 149.5, 146.2, 138.4, 137.8, 129.3, 128.4, 125.8, 125.0, 121.3 (Ar), 22.0 (CH<sub>3</sub>).

**3-(4-Methanesulfinylphenyl)-5-(2-pyridyl)-1,2,4-triazole (40e):** Prepared from **36e** (0.10 g, 0.37 mmol) according to **General procedure X** to yield **40e** as a white solid (0.056 g, 53%). m.p. 171-173 °C; <sup>1</sup>H NMR (400 MHz, DMSO-d<sub>6</sub>): δ = 14.98 (s, 1 H, NH), 8.73 (s, 1 H, Ar), 8.28 (d, *J* = 8.0 Hz, 2 H, Ar), 8.19 (d, *J* = 7.6 Hz, 1 H, Ar), 8.07-7.98 (m, 1 H, Ar), 7.81 (d, *J* = 7.4 Hz, 2 H, Ar), 7.60-7.51 (m, 1 H, Ar), 2.80 (s, 3 H, CH<sub>3</sub>) ppm. <sup>13</sup>C NMR (100 MHz, DMSO-d<sub>6</sub>): δ 160.8, 154.8 (C-3-, C-5-triazole), 149.5, 146.9, 145.9, 137.8, 133.2, 126.4, 125.2, 124.1, 121.4 (Ar), 43.1 (CH<sub>3</sub>) ppm. ESI-MS (positive mode) m/z calcd. for C<sub>14</sub>H<sub>13</sub>N<sub>4</sub>OS<sup>+</sup> (285.34), Found: 285.2 [M+H]<sup>+</sup>.

**3-(4-Methoxyphenyl)-5-(2-pyridyl)-1,2,4-triazole (40f):** Prepared from **36f** (0.15 g, 0.59 mmol) according to **General procedure X** to yield **40f** as a white solid (0.086 g, 58%). m.p. 188-191 °C (lit.<sup>14</sup> m.p. 183-185 °C); <sup>1</sup>H NMR (400 MHz, DMSO-d<sub>6</sub>): δ = 14.67 (s, 1 H, NH),

8.71 (brs, 1 H, Ar), 8.22-7.90 (m, 4 H, Ar), 7.61-7.41 (m, 1 H, Ar), 7.17-6.95 (m, 2 H, Ar), 3.81 (s, 3 H, CH<sub>3</sub>) ppm. <sup>13</sup>C NMR (100 MHz, CDCl<sub>3</sub>):  $\delta$  = 161.4, 160.1, 154.3 (C-OMe, C-3-, C-5-triazole), 149.4, 146.2, 137.5, 127.3, 124.7, 123.7, 121.3, 114.1 (Ar), 55.1 (CH<sub>3</sub>) ppm.

**3-(4-Cyanophenyl)-5-(2-pyridyl)-1,2,4-triazole (40h):** Prepared from **36h** (0.15 g, 0.60 mmol) according to **General procedure X** to yield **40h** as a white solid (0.060 g, 40%). m.p. 240-243 °C; <sup>1</sup>H NMR (400 MHz, DMSO-d<sub>6</sub>):  $\delta$  = 14.93 (s, 1 H, NH), 8.73 (s, 1 H, Ar), 8.22-7.95 (m, 4 H, Ar), 7.77-7.48 (m, 3 H, Ar) ppm. <sup>13</sup>C NMR (100 MHz, DMSO-d<sub>6</sub>):  $\delta$  = 160.7, 154.7 (C-3-, C-5-triazole), 149.5, 145.9, 137.8, 131.7, 130.3, 127.8, 125.1, 122.3, 121.3 (Ar), 107.8 (CN) ppm. Anal. Calcd. for C<sub>14</sub>H<sub>9</sub>N<sub>5</sub> (247.25): C, 68.01; H, 3.67; N, 28.32. Found: C, 68.11; H, 3.76; N, 28.41.

**3-(4-Acetamidophenyl)-5-(2-pyridyl)-1,2,4-triazole (40i):** Prepared from **36i** (0.15 g, 0.53 mmol) according to **General procedure X** to yield **40i** as a white solid (0.091 g, 61%). m.p. 290-292 °C; <sup>1</sup>H NMR (400 MHz, DMSO-d<sub>6</sub>):  $\delta$  = 14.74 (s, 1 H, NH), 10.11 (s, 1 H, NH), 8.71 (s, 1 H, Ar), 8.15 (d, *J* = 7.5 Hz, 1 H, Ar), 8.08-7.94 (m, 3 H, Ar), 7.76-7.65 (m, 2 H, Ar), 7.59-7.46 (m, 1 H, Ar), 2.08 (s, 3 H, CH<sub>3</sub>) ppm. <sup>13</sup>C NMR (100 MHz, DMSO-d<sub>6</sub>):  $\delta$  = 168.4 (CO), 161.5, 154.4 (C-3-, C-5-triazole), 149.5, 146.2, 140.1, 137.8, 130.3, 126.4, 125.0, 121.3, 118.8 (Ar), 24.0 (CH<sub>3</sub>) ppm. Anal. Calcd. for C<sub>15</sub>H<sub>13</sub>N<sub>5</sub>O (279.30): C, 64.51; H, 4.69; N, 25.07. Found: C, 64.61; H, 4.76; N, 25.16.

**3-(4-Pyridyl)-5-(2-pyridyl)-1,2,4-triazole (40j):** Prepared from **36j** (0.15 g, 0.67 mmol) according to **General procedure X** to yield **40j** as a white solid (0.045 g, 30%). m.p. 268-270 °C (lit.<sup>16</sup> m.p. 260-261 °C); <sup>1</sup>H NMR (400 MHz, DMSO-d<sub>6</sub>):  $\delta$  = 15.15 (s, 1 H, NH), 8.95-8.65 (m, 3 H, Ar), 8.35-7.81 (m, 4 H, Ar), 7.70-7.40 (m, 1 H, Ar) ppm. <sup>13</sup>C NMR (100 MHz,

DMSO-d6):  $\delta$  = 159.8, 156.0 (C-3-, C-5-triazole), 150.9, 150.1, 146.5, 138.4, 125.8, 122.0, 120.5 (Ar) ppm.

#### **ANALYSIS OF REACTION MIXTURES BY LCMS**

LC was performed on a Hypersil Gold (50 x 2.1mm, 1.9  $\mu$ m, with precolumn filter, Thermo Electron Corp., San Jose, CA, USA) column, using an Accela HPLC system (Thermo Electron Corp., San Jose, CA, USA) eluted with a gradient of acetonitrile (A) and water (B) containing 0.1% (V/V) formic acid each. The gradient was from 10% of A (hold for 1 min) to 90% A over 12 min, hold for 6 min and return to initial conditions and hold for 2 min to equilibrate the column. The LC system was coupled with a Thermo LTQ XL mass spectrometer (Thermo Electron Corp., San Jose, CA, USA) operated in a full scan positive ion ESI mode (m/z range was 150-2000 Da). The ion injection time was set to 100 ms. ESI parameters were a spray voltage of 5 kV, a capillary temperature of 300°C, a sheath gas flow of 20 units N<sub>2</sub> and an auxiliary gas flow of 10 ubuts N<sub>2</sub>. The tray temperature was set to 20°C and the column oven was set to 30 °C to perform the optimal retention of the compounds in the reaction mixtures. The injection amount was 1  $\mu$ L for each sample, the total concentration of all compounds in the samples was 50 ppm.

**Table S1.** Reactions of sugar derived *N'*-alkylidene-amidrazones with PIDA<sup>a</sup> - detailed product analysis

|           |                          |                           |                           | 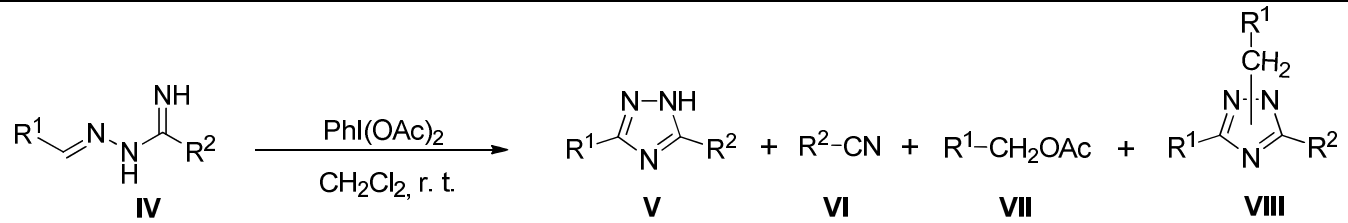                                                                                                                                                                                                                        |                                                                                                                                                                                                                                                                                                         |                                                                                                                                                                                                                                                       |                                                                                                                                                                                                                 |
|-----------|--------------------------|---------------------------|---------------------------|-----------------------------------------------------------------------------------------------------------------------------------------------------------------------------------------------------------------------------------------------------------------------------------------------------------|---------------------------------------------------------------------------------------------------------------------------------------------------------------------------------------------------------------------------------------------------------------------------------------------------------|-------------------------------------------------------------------------------------------------------------------------------------------------------------------------------------------------------------------------------------------------------|-----------------------------------------------------------------------------------------------------------------------------------------------------------------------------------------------------------------|
|           |                          |                           |                           | Detected compounds                                                                                                                                                                                                                                                                                        |                                                                                                                                                                                                                                                                                                         |                                                                                                                                                                                                                                                       |                                                                                                                                                                                                                 |
| Entry     | Starting compd (type IV) | R <sup>1</sup>            | R <sup>2</sup>            | V                                                                                                                                                                                                                                                                                                         | VI                                                                                                                                                                                                                                                                                                      | VII                                                                                                                                                                                                                                                   | VIII                                                                                                                                                                                                            |
| 1.        | <b>9</b>                 | Bz <sub>4</sub> -β-D-Glcp | Ph                        |  <p><b>21</b></p> <p>Calcd. for C<sub>42</sub>H<sub>33</sub>N<sub>3</sub>O<sub>9</sub> (723.22)</p> <p>Found:</p> <p>724.3, [M+H]<sup>+</sup>;</p> <p>1446.8, [2M+H]<sup>+</sup>;</p> <p>1468.9, [2M+Na]<sup>+</sup></p> | Ph-CN<br>not detected <sup>b</sup>                                                                                                                                                                                                                                                                      |  <p>Calcd. for C<sub>37</sub>H<sub>32</sub>O<sub>11</sub> (652.19)</p> <p>Found:</p> <p>653.8, [M+H]<sup>+</sup>;</p> <p>670.5, [M+H<sub>2</sub>O]<sup>+</sup></p> |  <p>Calcd. for C<sub>77</sub>H<sub>61</sub>N<sub>3</sub>O<sub>18</sub> (1315.40)</p> <p>Found: 1316.4, [M+H]<sup>+</sup></p> |
| <b>2.</b> | <b>18</b>                | Ph                        | Bz <sub>4</sub> -β-D-Glcp |  <p><b>21</b></p> <p>Calcd. for C<sub>42</sub>H<sub>33</sub>N<sub>3</sub>O<sub>9</sub> (723.22)</p> <p>Found:</p> <p>724.7, [M+H]<sup>+</sup>;</p> <p>1447.3, [2M+H]<sup>+</sup></p>                                    |  <p><b>1</b></p> <p>Calcd. for C<sub>35</sub>H<sub>27</sub>NO<sub>9</sub> (605.17)</p> <p>Found:</p> <p>606.0, [M+H]<sup>+</sup>;</p> <p>623.2, [M+H<sub>2</sub>O]<sup>+</sup></p> <p>628.2, [M+Na]<sup>+</sup></p> | Ph-CH <sub>2</sub> -OAc<br>not detected <sup>b</sup>                                                                                                                                                                                                  |  <p>Calcd. for C<sub>49</sub>H<sub>39</sub>N<sub>3</sub>O<sub>9</sub> (813.27)</p> <p>Found: 814.3, [M+H]<sup>+</sup></p>   |



Table S1. continued

|        |                          |                |                           | Detected compounds                                                                                                                                                                                                                       |                                                                                                                                                                                                                                                                                 |                                                                                                                                                                                   |                                                                                                                                                                                                                                           |
|--------|--------------------------|----------------|---------------------------|------------------------------------------------------------------------------------------------------------------------------------------------------------------------------------------------------------------------------------------|---------------------------------------------------------------------------------------------------------------------------------------------------------------------------------------------------------------------------------------------------------------------------------|-----------------------------------------------------------------------------------------------------------------------------------------------------------------------------------|-------------------------------------------------------------------------------------------------------------------------------------------------------------------------------------------------------------------------------------------|
| Ent ry | Starting compd (type IV) | R <sup>1</sup> | R <sup>2</sup>            | V                                                                                                                                                                                                                                        | VI                                                                                                                                                                                                                                                                              | VII                                                                                                                                                                               | VIII                                                                                                                                                                                                                                      |
| 3.     | <b>19</b>                | 4-MeO-Ph       | Bz <sub>4</sub> -β-D-Glcp | <p style="text-align: center;"><b>22</b></p> <p>Calcd. for C<sub>43</sub>H<sub>35</sub>N<sub>3</sub>O<sub>10</sub> (753.23)<br/>           Found:<br/>           754.7, [M+H]<sup>+</sup>;<br/>           1507.1, [2M+H]<sup>+</sup></p> | <p style="text-align: center;"><b>1</b></p> <p>Calcd. for C<sub>35</sub>H<sub>27</sub>NO<sub>9</sub> (605.17)<br/>           Found:<br/>           605.9, [M+H]<sup>+</sup>;<br/>           623.2, [M+H<sub>2</sub>O]<sup>+</sup>;<br/>           628.2, [M+Na]<sup>+</sup></p> | <p style="text-align: center;"><b>1</b></p> <p>Calcd. for C<sub>10</sub>H<sub>13</sub>O<sub>3</sub> (180.08)<br/>           Found:<br/>           120.9, [M-AcO]<sup>+</sup></p>  | <p style="text-align: center;"><b>23</b></p> <p>Calcd. for C<sub>51</sub>H<sub>43</sub>N<sub>3</sub>O<sub>11</sub> (873.29)<br/>           Found:<br/>           874.4, [M+H]<sup>+</sup>;<br/>           896.3, [M+Na]<sup>+</sup></p>   |
| 4.     | <b>20</b>                | Pyren-1-yl     | Bz <sub>4</sub> -β-D-Glcp | <p style="text-align: center;"><b>22</b></p> <p>Calcd. for C<sub>52</sub>H<sub>37</sub>N<sub>3</sub>O<sub>9</sub> (847.25)<br/>           Found:<br/>           848.3, [M+H]<sup>+</sup>;<br/>           1695.8, [2M+H]<sup>+</sup></p>  | <p style="text-align: center;"><b>1</b></p> <p>Calcd. for C<sub>35</sub>H<sub>27</sub>NO<sub>9</sub> (605.17)<br/>           Found:<br/>           605.9, [M+H]<sup>+</sup>;<br/>           623.2, [M+H<sub>2</sub>O]<sup>+</sup>;<br/>           628.3, [M+Na]<sup>+</sup></p> | <p style="text-align: center;"><b>23</b></p> <p>Calcd. for C<sub>14</sub>H<sub>19</sub>O<sub>2</sub> (274.10)<br/>           Found:<br/>           215.1, [M-AcO]<sup>+</sup></p> | <p style="text-align: center;"><b>23</b></p> <p>Calcd. for C<sub>69</sub>H<sub>47</sub>N<sub>3</sub>O<sub>9</sub> (1061.33)<br/>           Found:<br/>           1062.3, [M+H]<sup>+</sup>;<br/>           1084.3, [M+Na]<sup>+</sup></p> |

<sup>a</sup>Roman numbers denote compound types and are identical with those in mechanistic Scheme 6.

<sup>b</sup>The compound can be present in the mixture, but was not detected due to its low molecular weight.

**Table S3.** LC-MS analysis of reaction mixtures of sugar derived *N*<sup>1</sup>-alkylidene-amidrazones with NBS<sup>a</sup>

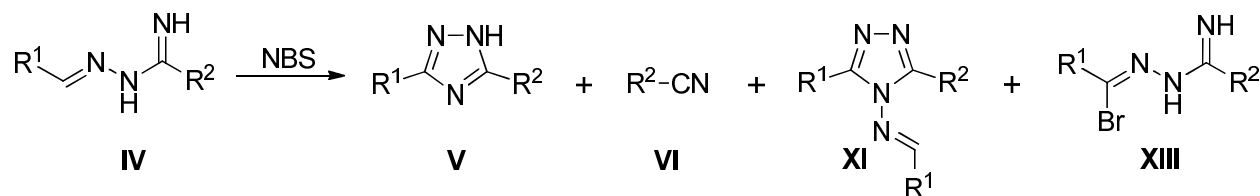

| Entry | Starting compd (type IV) | R <sup>1</sup>            | R <sup>2</sup> | Detected compounds                                                                                                                                                                          |                                    |                                                                                                                                                                                                                                         |                                                                                                                                                                                              |
|-------|--------------------------|---------------------------|----------------|---------------------------------------------------------------------------------------------------------------------------------------------------------------------------------------------|------------------------------------|-----------------------------------------------------------------------------------------------------------------------------------------------------------------------------------------------------------------------------------------|----------------------------------------------------------------------------------------------------------------------------------------------------------------------------------------------|
|       |                          |                           |                | V                                                                                                                                                                                           | VI                                 | XI                                                                                                                                                                                                                                      | XIII                                                                                                                                                                                         |
| 1.    | <b>9</b>                 | Bz <sub>4</sub> -β-D-Glcp | Ph             | <p style="text-align: center;"><b>21</b></p> <p>Calcd. for C<sub>42</sub>H<sub>33</sub>N<sub>3</sub>O<sub>9</sub> (723.22)<br/>           Found:<br/>           724.5 [M+H]<sup>+</sup></p> | Ph-CN<br>not detected <sup>b</sup> | <p style="text-align: center;"><b>XI</b></p> <p>Calcd. for C<sub>77</sub>H<sub>60</sub>N<sub>4</sub>O<sub>18</sub> (1328.39)<br/>           Found:<br/>           1329.5 [M+H]<sup>+</sup><br/>           1351.4 [M+Na]<sup>+</sup></p> | <p style="text-align: center;"><b>25</b></p> <p>Calcd. for C<sub>42</sub>H<sub>35</sub>N<sub>3</sub>O<sub>10</sub> (741.23)<br/>           Found:<br/>           742.8 [M+H]<sup>+</sup></p> |

**Table S3.** *continued*

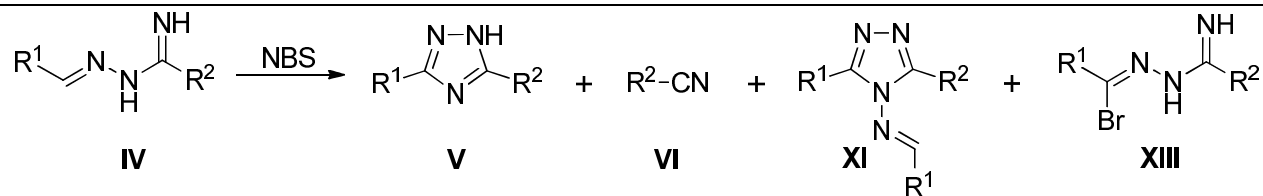

| Entry | Starting compd (type IV) | R <sup>1</sup> | R <sup>2</sup>            | V                                                                                                                                                                                                                                                                            | VI                                                                                                                                                                                                                                                                         | Detected compounds XI                                                                                                                                                                                                               | XIII                                                                                                                                                                                         |
|-------|--------------------------|----------------|---------------------------|------------------------------------------------------------------------------------------------------------------------------------------------------------------------------------------------------------------------------------------------------------------------------|----------------------------------------------------------------------------------------------------------------------------------------------------------------------------------------------------------------------------------------------------------------------------|-------------------------------------------------------------------------------------------------------------------------------------------------------------------------------------------------------------------------------------|----------------------------------------------------------------------------------------------------------------------------------------------------------------------------------------------|
| 2.    | 18                       | Ph             | Bz <sub>4</sub> -β-D-Glcp | <p style="text-align: center;"><b>21</b></p> <p>Calcd. for C<sub>42</sub>H<sub>33</sub>N<sub>3</sub>O<sub>9</sub> (723.22)<br/>           Found:<br/>           724.9 [M+H]<sup>+</sup><br/>           746.6 [M+Na]<sup>+</sup><br/>           1447.4 [2M+H]<sup>+</sup></p> | <p style="text-align: center;"><b>1</b></p> <p>Calcd. for C<sub>35</sub>H<sub>27</sub>NO<sub>9</sub> (605.17)<br/>           Found:<br/>           606.1 [M+H]<sup>+</sup><br/>           623.2 [M+H<sub>2</sub>O]<sup>+</sup><br/>           628.3 [M+Na]<sup>+</sup></p> | <p style="text-align: center;"><b>11</b></p> <p>Calcd. for C<sub>49</sub>H<sub>38</sub>N<sub>4</sub>O<sub>9</sub> (826.26)<br/>           Found:<br/>           827.5 [M+H]<sup>+</sup><br/>           849.7 [M+Na]<sup>+</sup></p> | <p style="text-align: center;"><b>13</b></p> <p>Calcd. for C<sub>42</sub>H<sub>35</sub>N<sub>3</sub>O<sub>10</sub> (741.23)<br/>           Found:<br/>           742.2 [M+H]<sup>+</sup></p> |

<sup>a</sup>Roman numbers denote compound types and are identical with those in mechanistic Scheme 8.

<sup>b</sup>The compound can be present in the mixture, but was not detected due to its low molecular weight.

## REFERENCES

1. L. Somsák and V. Nagy, *Tetrahedron: Asymm.*, 2000, **11**, 1719-1727. Corrigendum 2247.
2. L. Dong, L. Li, L. Ma and L. Zhang, *Chin. Chem. Lett.*, 1992, **3**, 597-600.
3. R. W. Myers and Y. C. Lee, *Carbohydr. Res.*, 1984, **132**, 61-85.
4. R. W. Myers and Y. C. Lee, *Carbohydr. Res.*, 1986, **154**, 145-163.
5. É. Bokor, A. Fekete, G. Varga, B. Szócs, K. Czifrák, I. Komáromi and L. Somsák, *Tetrahedron*, 2013, **69**, 10391-10404.
6. F. H. Case, *J. Org. Chem.*, 1965, **30**, 931-933.
7. D. Ranft, T. Seyfarth, K. J. Schaper, G. Lehwark-Yvetot, C. Bruhn and A. Buge, *Arch. Pharm.*, 1999, **332**, 427-430.
8. S. K. Samanta and J. Yli-Kauhaluoma, *J. Comb. Chem.*, 2005, **7**, 142-146.
9. M. J. Haddadin and E. H. G. Zadeh, *Tetrahedron Lett.*, 2010, **51**, 1654-1656.
10. A. Omodeisale, P. Consonni and G. Galliani, *J. Med. Chem.*, 1983, **26**, 1187-1192.
11. O. Bekircan, B. Kahveci and M. Küçük, *Turk. J. Chem.*, 2006, **30**, 29-40.
12. J. K. Wang, Y. X. Zong and G. R. Yue, *Synlett*, 2005, 1135-1136.
13. H. Weidinger and J. Kranz, *Chem. Ber.*, 1963, **96**, 1064-1070.
14. E. Orselli, G. S. Kottas, A. E. Konradsson, P. Coppo, R. Fröhlich, L. De Cola, A. van Dijken, M. Büchel and H. Börner, *Inorg. Chem.*, 2007, **46**, 11082-11093.
15. M. Santus, *Pol. J. Chem.*, 1980, **54**, 1067-1072.
16. E. J. Browne, *Aust. J. Chem.*, 1975, **28**, 2543-2546.
